# On the Role of Financial Support Programs in Mitigating the Sars-CoV-2 Spread in Brazil

Vinicius V. L. Albani<sup>\*</sup>, Roseane Albani<sup>†</sup>, Nara Bobko<sup>‡</sup>, Eduardo Massad<sup>§¶</sup> and Jorge P. Zubelli<sup>||</sup>

November 27, 2021

## Abstract

We calculate the impact of a socioeconomic program during 2020 as a measure to mitigate the Coronavirus Disease 2019 (COVID-19) outbreak in Brazil. For each Brazilian State, we estimate the time-dependent reproduction number from daily reports of COVID-19 infections and deaths using a Susceptible-Exposed-Infected-Recovered-like (SEIR-like) model. Then, we analyse the correlations between the reproduction number, the amount of individuals receiving governmental aid, and the index of social isolation based on mobile phone information. We conclude that socioeconomic programs had a significant impact on reducing the accumulated numbers of infections and deaths by allowing those in need to stay at home, adhering to social isolation.

## 1 Introduction

Coronavirus Disease 2019 (COVID-19) pandemic has challenged public authorities on a series of perspectives including public health and the economy. By 10-Nov-2021, COVID-19 caused more than 250 million infections and 5.1 million deaths [1]. During 2020, as vaccination campaigns and vaccination roll-out plans only started by the end of the year in some countries, the only possible disease contention measures, besides social distance and the use of face masks, were lockdowns. Lockdowns were widely used and numerous countries have succeeded to control and reduce COVID-19 infections. However, the use of such kind of measure impacted the economy and, in 2020, the International Monetary Fund have estimated a drop of 3.5% in the world output [2]. In order to reduce economic losses and save the economic activity, many countries have implemented a series of programs to fund individuals that lost their jobs during lockdowns and to help endangered businesses to survive.

In the whole text we converted the amounts in BRL to USD, using the conversion rate of \$1,000.00 BRL = \$182.72 USD from 10-Nov-2021 [3].

---

<sup>\*</sup>Department of Mathematics, Federal University of Santa Catarina, Florianopolis, Brazil, [v.albani@ufsc.br](mailto:v.albani@ufsc.br)

<sup>†</sup>Instituto Politecnico do Rio de Janeiro, State University of Rio de Janeiro, Nova Friburgo, Brazil, [roseanealves75@gmail.com](mailto:roseanealves75@gmail.com)

<sup>‡</sup>Federal University of Technology - Paraná, Curitiba, Brazil, [narabobko@gmail.com](mailto:narabobko@gmail.com)

<sup>§</sup>School of Medicine, University of São Paulo and LIM01-HCFMUSP, São Paulo, Brazil

<sup>¶</sup>School of Applied Mathematics, Fundação Getúlio Vargas, Rio de Janeiro, Brazil, [eduardo.massad@fgv.br](mailto:eduardo.massad@fgv.br)

<sup>||</sup>Mathematics Department, Khalifa University, Abu Dhabi, UAE, [jorge.zubelli@ku.ac.ae](mailto:jorge.zubelli@ku.ac.ae)

29 In Brazil, a massive social program called “*Auxílio Emergencial*” (AE) was created to pay  
30 a monthly amount to eligible individuals from \$54.82 to \$219.26 USD. The monthly amount  
31 depended on a series of factors, as the number of family members and the period of the year.  
32 In 2020, the program was operational from April to December, then it was suspended in  
33 January to March 2021, returning in April 2021, and, by June 2021, it was still in function  
34 but paying lower monthly amounts, ranging from \$27.41 USD to \$68.52 USD, with mean  
35 value of \$45.68 USD [4]. The program reached a median proportion of 22.2% (min–max  
36 14.7%–24.1%) of the Brazilian population, paying the monthly mean amount of \$154.86 and  
37 \$101.81 USD during April to August and September to December 2020, respectively [5]. The  
38 monthly payments represented a substantial proportion of the Brazilian minimum wage in  
39 2020, which was \$190.94 USD [6], and the total amount invested in the program represented  
40 3.88% of the Brazilian gross domestic product (GDP) in 2020 [7].

41 During the COVID-19 pandemic, different studies investigated the relation of ethnic and  
42 socioeconomic characteristics with the risk of developing SARS-CoV-2 infection. For example,  
43 Niedzwiedz *et al.* [8] used Poisson regression to study such a relation in the United Kingdom  
44 and found that some ethnic minorities and those under socioeconomic deprivation were as-  
45 sociated with a higher risk of infection. Similarly, Hoebel *et al.* [9] compared differences in  
46 COVID-19 incidence within groups under different levels of socioeconomic deprivation during  
47 the second wave in Germany, finding that during the beginning of the wave, the incidence  
48 was higher in less deprived locations, but the situation reversed from the middle to the end of  
49 the outbreak. They also found that women in locations with high socioeconomic deprivation  
50 had a higher risk of infection. In Cape Town, South Africa, Shaw *et al.* [10] investigated the  
51 relationship between antibody positivity, COVID-19 symptom status, medical history, and  
52 sociodemographic variables using a seroprevalence study dataset. The study concluded that  
53 seropositivity was significantly associated with socioeconomic deprivation. Horta *et al.* [11]  
54 achieved similar findings, which analyzed COVID-19 incidence in Brazil through a nationwide  
55 seroprevalence study undertaken in 2020. The prevalence of antibodies against SARS-CoV-2,  
56 according to this study, was highly dependent on socioeconomic status, education, and ethnic  
57 group, with the poorest individuals, those with little education, those self-denominated black  
58 or brown, as well as indigenous people were at higher risk of infection. Allan-Blitz *et al.* [12],  
59 based on results of SARS-CoV-2 tests from testing sites in Los Angeles, United States, and  
60 accounting for United States Census report data on average income, healthcare coverage, and  
61 employment status by zip code, the authors found that individuals from places with lower  
62 average income, lower rates of employment, or lower rates of health insurance were more likely  
63 to test positive for COVID-19 infection. Therefore, socioeconomic deprivation seems to be a  
64 relevant factor in the risk of developing SARS-CoV-2, which indicates the supporting role of  
65 programs like the *Auxílio Emergencial* (or AE) in disease spread control during outbreaks.

66 In 2020, non-pharmaceutical measures, like lockdowns, were widely used to control COVID-  
67 19 outbreaks. Thus, many recent works have investigated the relationship between mobility  
68 and disease spread control, using official reports of COVID-19 infections, mobility data from  
69 different sources, and several data analysis tools. For example, using statistical methods,  
70 Kissler *et al.* [13] compared Facebook mobility data from New York City, United States  
71 (US), with SARS-CoV-2 prevalence, finding that the virus prevalence was lower in locations  
72 where individuals traveled less to neighbor places. In Larrosa *et al.* [14], official reports of  
73 infections and mobility data from Google in Argentina were used to assess the effectiveness of  
74 lockdowns and social distancing. The authors concluded that such restriction measures were  
75 more effective for short-term dissemination spread than in the long-term. Using an agent-

76 based spatial model and mobility data from Facebook in different countries, Kishore *et al.*  
77 [15] provided that mobility restrictions effectively reduced the contact between individuals  
78 and controlled outbreaks. In Erim *et al.* [16], interrupted time series were applied to analyze  
79 mobility data from mobile phones in Nigeria and their association with reports of COVID-19  
80 infections, finding that mobility restrictions were associated with the reduction in the number  
81 of cases.

82 In Rüdiger *et al.* [17], a statistically-based metric of the social-distancing behavior, the  
83 so-called *contact index*, was developed using cell phone GPS data from Germany. The au-  
84 thors found a high correlation between the disease incidence and the contact index. Mehta  
85 *et al.* [18] Used logistic regression and Monte Carlo Markov Chain Methods to assess the  
86 association between holiday meetings and SARS-COV-2 positivity in the weeks following the  
87 2020 Thanksgiving in the US. They concluded that individuals who had guests or traveled  
88 more were more likely to test positive if they also had, for example, participated in more than  
89 one non-essential activity by day in the prior weeks of the holiday. Candido *et al.* [19] ap-  
90 plied a mobility-driven transmission model and found that non-pharmaceutical interventions,  
91 such as lockdowns, considerably reduced the SARS-CoV-2 incidence in São Paulo and Rio de  
92 Janeiro, Brazil. Bisanzio *et al.* [20] presented a methodology to predict the spatiotemporal  
93 dissemination of reported COVID-19 cases at a global level using geolocated Twitter data.  
94 Tomori *et al.* [21] quantified the change in social contact patterns and aggregated mobility  
95 information in Germany. They concluded that contact survey data seemed to reflect infection  
96 dynamics better than population mobility data, and these data can be related to different  
97 aspects of infection dynamics.

98 In Li *et al.* [22], based on community mobility metrics from Google, the authors found that  
99 increasing visits to retail and recreation places, workplaces, and transit stations are linked  
100 to the increase of the transmission of Sars-Cov-2 in different cities across the UK. Alleman  
101 *et al.* [23] proposed an SEIR-like metapopulation model to describe SARS-CoV-2 spread  
102 accounting for the disease characteristics and social contact, where social contact patterns  
103 are based on Google Community Mobility data and hospitalization data from Belgium. The  
104 authors achieved that reopening schools during lockdown could lead to a substantial increase  
105 in virus transmission. Lison *et al.* [24] investigated the relation between mobility, based on  
106 mobile phone information, and the propagation of the Sars-CoV-2 in Switzerland during the  
107 first and second waves. Using a regression model, the authors found that mobility reduction  
108 translates into a reduction of the disease spread. In Brown *et al.* [25], mobility measures  
109 based on mobile phone data from Canada were used to quantify the mobility level needed  
110 to control SARS-CoV-2 spread. The authors found that each 10% increase in the difference  
111 between the observed and the mobility level necessary to control propagation was associated  
112 with a 25% increase in the weak growth rate of infections. Tobias [26] used quasi-Poisson  
113 regression to analyze trends of incident cases, deaths, and intensive care unit admissions  
114 in Italy and Spain before and after national lockdowns, concluding that after lockdowns,  
115 incidence trends were considerably reduced in both countries. Coelho *et al.* [27] used mobile  
116 phone data, before and during the pandemic, to assess the movement patterns between cities  
117 within the states of São Paulo and Rio de Janeiro in Brazil. Such patterns were used in the  
118 simulations of a spatial-temporal model to predict potential foci of infections. Peixoto *et al.*  
119 [28] identified places in Brazil with a higher risk of outbreaks and higher social vulnerability  
120 using air travel statistics, demographic information, socioeconomic indicators, health care  
121 capacity, and reports of infections. The data was analyzed using probabilistic models and  
122 multivariate cluster analysis.

123 In summary, these articles illustrate that there are strong evidences that mobility restric-  
124 tions implies in reduction of contacts and in the disease incidence.

125 This study aims to investigate if a social program, namely the AE, which reached a consid-  
126 erable fraction of the Brazilian population during the COVID-19 pandemic, is an effective tool  
127 in disease contention, since other more effective measures, like vaccination, were unavailable  
128 in 2020.

129 The analysis is based on a comparison between different time series for each Brazilian state,  
130 that include the so-called social isolation index (SII), which is based on mobile phone data  
131 [29], the daily number of reported COVID-19 infections, the time-dependent reproduction  
132 number  $\mathcal{R}(t)$ , the statewide population proportion receiving the AE, and the monthly mean  
133 amount paid by the program. The results are aggregated by the Brazilian regions due to their  
134 large geographic, economic, and demographic differences.

135 Analyzing socioeconomic measures under the public health perspective and estimating its  
136 quantitative impact as an outbreak contention policy, to the best of the authors knowledge,  
137 are the main contributions of this work. Such methodology sheds light on the important role  
138 such polices can play in the future, helping public authorities to design coordinate responses  
139 to control epidemics of emerging infectious diseases.

140 The article is divided as follows, Section 2 presents the epidemiological model and the data  
141 analysis methodology. Results are presented and analyzed in Section 3. Section 4 discusses  
142 the proposed methodology and concluding remarks are designed in Section 5.

## 143 2 Methods

144 Since we aim to analyze and compare the evolution of COVID-19 infections with social isola-  
145 tion index and the AE data, we propose a susceptible-exposed-infected-recovered-like (SEIR-  
146 like) model to estimate the disease dynamics from the data of infections and deaths [30],  
147 as well as the reproduction number, which is evaluated using the next generation matrix  
148 technique [31].

### 149 2.1 The Epidemiological Model

The SEIR-like model accounts for five compartments, namely, susceptible (S), exposed (E),  
infective (I), recovered (R), and deceased (D). The dynamics between compartments is given  
by the following system of ordinary differential equations without demography:

$$\frac{dS}{dt} = -\beta(t)SI, \quad (1)$$

$$\frac{dE}{dt} = \beta(t)SI - \sigma E, \quad (2)$$

$$\frac{dI}{dt} = \sigma E - (\nu(t) + \mu(t))I, \quad (3)$$

$$\frac{dR}{dt} = \nu(t)I, \quad (4)$$

$$\frac{dD}{dt} = \mu(t)I. \quad (5)$$

150 Here,  $\beta(t)$  denotes the unknown time-dependent infection rate,  $\sigma$  represents the inverse of the  
151 infection to onset mean time estimated as 5.1 days [32],  $\nu$  is the recovery rate, that we set

152 to  $1 - \mu$ , where  $\mu$  is the death rate. For each date  $t$ , we set as the reported deaths on day  $t$   
153 divided by the reported infections on day  $t - 12$ , where 12 is the estimated meantime from  
154 infection to death [30, 33, 34].

155 The infection rate for each date  $t$  is estimated from the daily reported infections by  
156 minimizing the following function

$$\mathcal{F}(\beta(t)) = \frac{1}{2} (\sigma E(t) - \mathcal{I}(t))^2 + \frac{10^{-3}}{2} (\beta(t) - \beta(t - 1))^2, \quad (6)$$

157 where  $\mathcal{I}(t)$  represents the COVID-19 reports on day  $t$ .

158 The objective function in Eq. (6) is minimized to calibrate the transmission parameters  
159 of the model in the system in Eqs. (2)–(5). The first part of the right-hand side (RHS) of  
160 Eq. (6) evaluates the square of the Euclidean distance between the daily reports of COVID-19  
161 infections, denoted by  $\mathcal{I}(t)$ , and their corresponding model predictions, represented by  $\sigma E(t)$ .  
162 The second part of the RHS of Eq. (6) is the penalty term, that stabilizes the minimization and  
163 avoids overfitting. It states that the square of the Euclidean distance between the calibrated  
164  $\beta(t)$  and  $\beta(t - 1)$  must be minimal. However, the importance of this term in the minimization  
165 is stated by the regularization parameter, namely,  $10^{-3}/2$ , which balances the introduction  
166 of prior information and the reduction of overfitting [35].

## 167 2.2 Data Analysis

168 After calibrating the model and evaluating the reproduction number  $\mathcal{R}(t)$ , we compare, for  
169 each Brazilian State, the following datasets:

- 170 1. The daily reported COVID-19 infections during the period 01-Mar-2020 to 11-May-2021  
171 [36].
- 172 2. The reproduction number  $\mathcal{R}(t)$  obtained from the SEIR-like model for the same period,  
173 and its monthly median values.
- 174 3. The statewide population proportion receiving the AE from April to December 2020.
- 175 4. The mean amount paid monthly by the AE from April to December 2020.
- 176 5. The daily social isolation index for the period 01-Mar-2020 to 19-Mar-2021, and its  
177 monthly median values.
- 178 6. The empirical correlation between the daily changes in the social isolation index and  
179 the reproduction number.

180 We also take into consideration the estimated statewide monthly average income and un-  
181 employment in 2020 [37, 38]. We do not consider education indexes since, by 2019, there  
182 were no significant variations between them in different Brazilian regions [39]. The analysis  
183 is summarized by each Brazilian region.

184 The correlation evaluation is performed as follows. Firstly, we replaced the original time  
185 series of the reproduction number  $\mathcal{R}(t)$  and the social isolation index  $\text{SII}(t)$  by their 7-day  
186 moving averaged versions. Then, we evaluated their corresponding daily changes, i.e.,

$$\Delta\mathcal{R}(t) = \mathcal{R}(t) - \mathcal{R}(t - 1) \quad \text{and} \quad \Delta\text{SII}(t) = \text{SII}(t) - \text{SII}(t - 1).$$

187 A moving window of 30 consecutive days was used to evaluate the time series of the correlation  
188 between  $\Delta\mathcal{R}$  and  $\Delta\text{SII}$ . We also tested different delays between the series of  $\Delta\mathcal{R}$  and  $\Delta\text{SII}$ ,  
189 i.e, the correlations between  $\Delta\mathcal{R}(t + \Delta t)$  and  $\Delta\text{SII}(t)$ , with  $\Delta t$  ranging from 0 to 30 days,  
190 were evaluated. For each state, the delay in time that led to the maximum number of negative  
191 values in the correlation time series was selected. We expect a negative correlation since an  
192 increase in the social isolation index, in principle, must cause a drop in the reproduction  
193 number. Therefore, this procedure can be interpreted as the mean time that an increment in  
194 SII takes to cause a change in  $\mathcal{R}$ .

### 195 **2.3 Estimating the Impact of the AE on the Number of Infections**

196 To estimate the quantitative impact of the AE on the accumulated numbers of infections, we  
197 perform the following steps:

- 198 1. Firstly, we consider the estimated delay between changes in the social isolation index  
199 and the corresponding changes in the reproduction number.
- 200 2. Then, we use such delay to define the estimated transmission parameter  $\beta$  as a function  
201 of SII. We perform this for all realizations of  $\beta$  estimated using bootstrap techniques  
202 [40].
- 203 3. For each Brazilian state, we aggregate the resulting set of  $\beta$  values as functions of SII.  
204 This procedure generates a set of possible values for  $\beta$  associated with each SII value.
- 205 4. We evaluate the number of infections by using the  $\beta$  values obtained by changing SII,  
206 the SEIR-type model in Eqs. (2)–(5).
- 207 5. We exclude the values smaller than the observed ones, evaluate median values, and  
208 select the confidence intervals.

## 209 **3 Results**

210 Brazilian states are grouped into five geographic regions, namely, North (N), Northeast (NE),  
211 Central-West (CW), Southeast (SE), and South (S), where each of them has intrinsic geo-  
212 graphic, economic, and demographic characteristics important for the analysis that follows.  
213 For example, the monthly average income varies considerably between these regions, and the  
214 impact of the AE on social isolation adherence may differ accordingly. Thus, we analyze the  
215 datasets for each state, then we summarize it for each Brazilian region.

216 Figure 1 and Table 1 present, for each Brazilian State, the accumulated numbers of  
217 COVID-19 infections per 100K individuals in 2020, the statewide median population pro-  
218 portions receiving the AE in 2020, the median values of the social isolation index in 2020  
219 and 2021, the statewide monthly average income in 2020, and the statewide unemployment  
220 in 2020. Some states, where larger proportions of the population receiving the social-program  
221 support, presented larger median values of the social isolation index. In general, States  
222 with the higher unemployment and lower monthly average incomes in 2020 presented larger  
223 population proportions covered by the AE. Moreover, besides exceptions, states with larger  
224 accumulated numbers of COVID-19 per 100K individuals were the same that presented lower  
225 SII values. The summary for each region can be found below. Additional figures and tables  
226 are in the Supplementary Material.

227 It is worth mentioning that, during the period of analysis, vaccination in Brazil was not  
228 significant [41].

| State | Region | Cases | Deaths | Auxílio 2020        | Social Isolation Index (Median and 75% CI) |                     | Income    | Unempl. |
|-------|--------|-------|--------|---------------------|--------------------------------------------|---------------------|-----------|---------|
|       |        |       |        | Median (Min–Max)    | 2020                                       | 2021                |           |         |
| AC    | N      | 4653  | 88.9   | 27.8% (21.7%–30.5%) | 43.1% (38.1%–50.1%)                        | 44.9% (38.7%–52.1%) | \$167.55  | 15.1%   |
| AM    | N      | 4777  | 126    | 28.4% (21.1%–30.7%) | 41.6% (36.6%–49.9%)                        | 42.1% (36.0%–47.5%) | \$155.68  | 15.8%   |
| AP    | N      | 7914  | 107    | 30.0% (20.6%–32.6%) | 41.1% (36.8%–50.0%)                        | 48.5% (40.1%–55.5%) | \$163.17  | 14.9%   |
| PA    | N      | 3378  | 82.7   | 28.3% (21.2%–30.8%) | 37.6% (33.5%–46.8%)                        | 37.0% (33.5%–49.7%) | \$161.34  | 10.4%   |
| RO    | N      | 5329  | 101    | 25.9% (15.5%–28.9%) | 40.4% (36.3%–48.8%)                        | 39.6% (32.7%–47.1%) | \$213.60  | 10.4%   |
| RR    | N      | 10883 | 124    | 29.0% (20.2%–31.8%) | 41.2% (36.6%–47.5%)                        | 43.1% (37.1%–51.1%) | \$179.61  | 16.4%   |
| TO    | N      | 5682  | 77.6   | 25.4% (16.7%–27.4%) | 34.8% (31.5%–43.1%)                        | 33.9% (30.1%–43.0%) | \$193.68  | 11.6%   |
| AL    | NE     | 3127  | 74.3   | 22.9% (17.6%–24.7%) | 39.4% (35.2%–45.8%)                        | 37.4% (33.7%–46.9%) | \$145.45  | 18.6%   |
| BA    | NE     | 3305  | 61.1   | 25.1% (19.2%–26.8%) | 39.4% (35.7%–46.5%)                        | 38.0% (36.1%–48.0%) | \$176.32  | 19.8%   |
| CE    | NE     | 3647  | 109    | 27.2% (20.7%–28.9%) | 40.9% (37.6%–48.6%)                        | 41.4% (39.7%–49.2%) | \$187.84  | 13.2%   |
| MA    | NE     | 2824  | 63.3   | 26.2% (21.4%–28.6%) | 38.6% (35.7%–45.3%)                        | 39.7% (36.4%–45.3%) | \$123.52  | 15.9%   |
| PB    | NE     | 4122  | 90.9   | 26.4% (20.9%–28.3%) | 39.6% (35.7%–45.1%)                        | 39.0% (35.4%–45.5%) | \$162.99  | 14.6%   |
| PE    | NE     | 2310  | 100    | 23.9% (17.6%–25.3%) | 38.8% (35.1%–47.1%)                        | 41.2% (36.0%–47.1%) | \$163.90  | 16.8%   |
| PI    | NE     | 4348  | 86.5   | 28.4% (22.6%–30.6%) | 39.6% (36.0%–48.3%)                        | 38.5% (33.2%–48.3%) | \$156.96  | 12.8%   |
| RN    | NE     | 3341  | 84.7   | 26.1% (19.2%–27.7%) | 39.1% (34.3%–49.9%)                        | 35.9% (33.4%–49.9%) | \$ 196.79 | 15.8%   |
| SE    | NE     | 4852  | 107    | 25.2% (19.0%–26.9%) | 38.3% (34.5%–44.0%)                        | 37.8% (34.0%–45.8%) | \$187.84  | 18.4%   |
| DF    | CW     | 8239  | 139    | 19.1% (11.0%–21.9%) | 39.5% (35.9%–47.3%)                        | 38.2% (35.5%–48.2%) | \$452.23  | 14.8%   |
| GO    | CW     | 4342  | 95.7   | 22.9% (13.6%–25.6%) | 36.1% (32.8%–43.7%)                        | 34.8% (32.5%–44.9%) | \$229.86  | 12.4%   |
| MS    | CW     | 4761  | 82.9   | 22.6% (13.7%–25.4%) | 37.3% (34.2%–45.3%)                        | 37.0% (30.4%–44.1%) | \$271.89  | 10.0%   |
| MT    | CW     | 5088  | 126    | 23.6% (14.0%–26.4%) | 37.2% (33.6%–45.5%)                        | 36.1% (30.8%–45.7%) | \$255.99  | 9.7%    |
| ES    | SE     | 6108  | 125    | 24.4% (15.1%–27.2%) | 38.1% (33.8%–46.7%)                        | 36.8% (31.2%–46.9%) | \$246.12  | 12.7%   |
| MG    | SE     | 2550  | 55.9   | 20.1% (12.8%–22.1%) | 38.0% (34.8%–45.1%)                        | 37.4% (31.1%–45.5%) | \$240.09  | 12.5%   |
| RJ    | SE     | 2503  | 147    | 22.7% (14.4%–25.1%) | 39.0% (35.3%–44.8%)                        | 38.0% (35.0%–47.6%) | \$314.83  | 17.4%   |
| SP    | SE     | 3159  | 101    | 17.7% (10.6%–20.0%) | 38.4% (34.1%–47.2%)                        | 36.2% (30.5%–46.1%) | \$331.45  | 13.9%   |
| PR    | S      | 3617  | 69.2   | 19.8% (11.6%–22.3%) | 40.4% (37.1%–46.9%)                        | 39.3% (34.4%–47.0%) | \$275.54  | 9.4%    |
| RS    | S      | 3937  | 77.7   | 17.8% (10.4%–20.6%) | 39.4% (34.3%–44.4%)                        | 41.5% (36.2%–48.2%) | \$321.40  | 9.1%    |
| SC    | S      | 6792  | 72.4   | 16.3% (9.22%–19.3%) | 38.1% (33.6%–48.4%)                        | 37.5% (30.3%–48.6%) | \$298.20  | 6.1%    |

Table 1: Total COVID-19 infections and deaths per 100K individuals reported in 2020 (Cases and Deaths), median, minimum and maximum monthly mean values paid by AE in 2020 (Auxílio 2020), median and 75% confidence interval of the daily social isolation index values in 2020 and 2021 (Social Isolation Index), statewide monthly average income in 2020 (Income) in USD, and unemployment in 2020 (Unempl.).

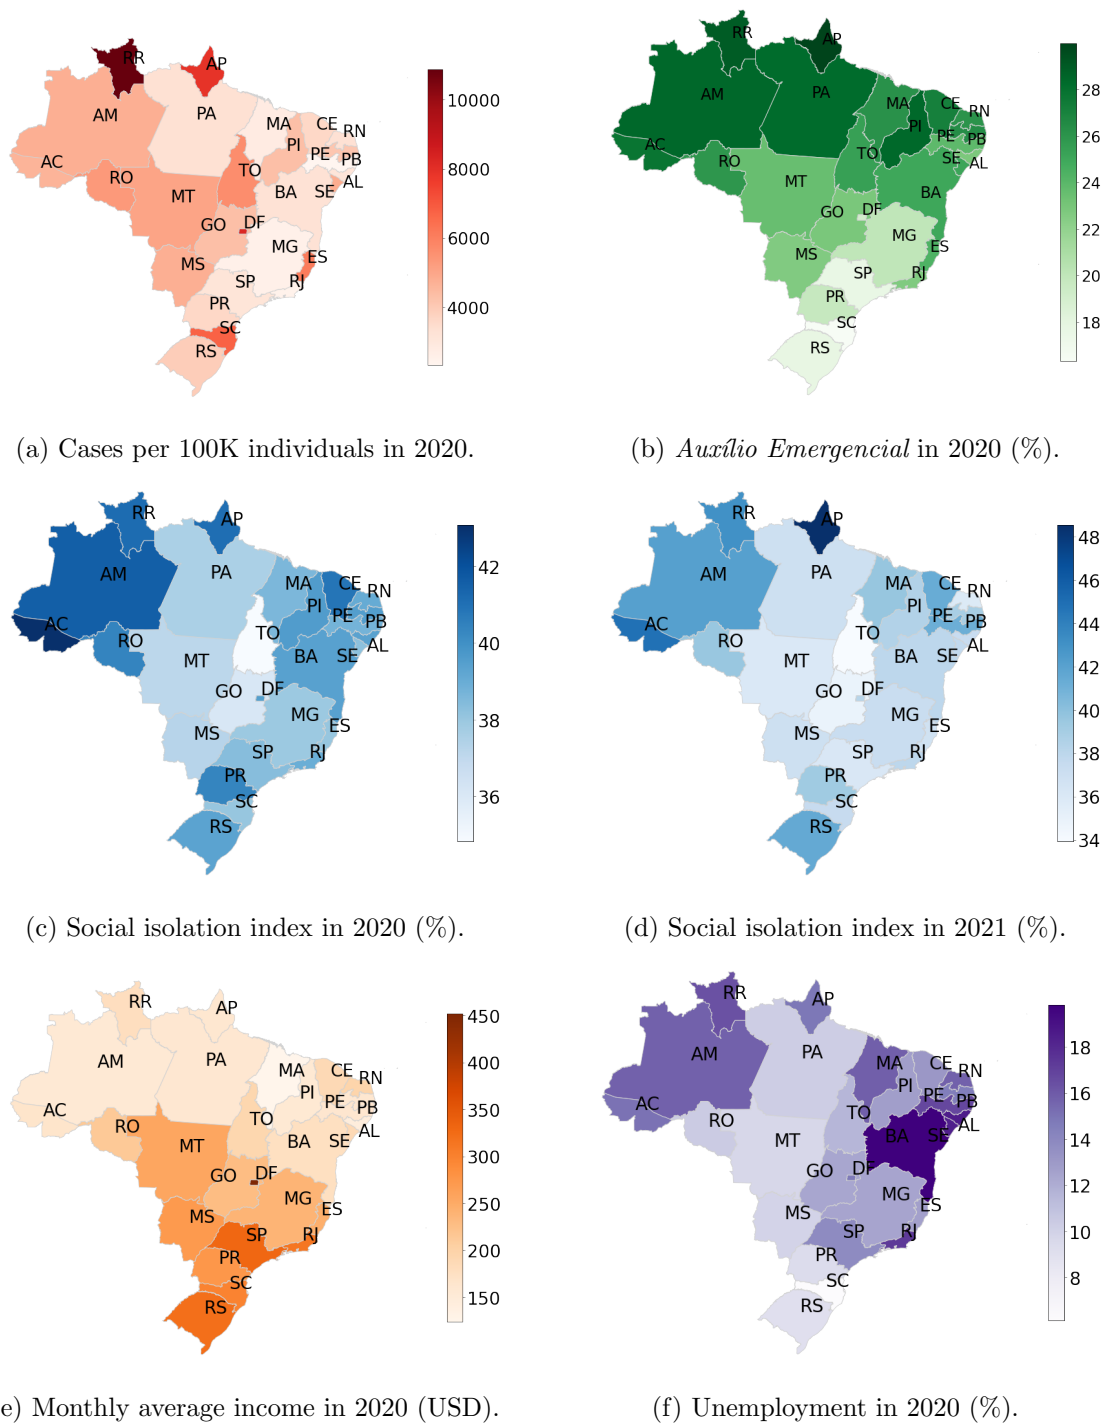

Figure 1: (a) Total number of COVID-19 infections per 100 thousand individuals for each state in Brazil during 2020. (b) Statewide median population proportions receiving the AE in 2020. Statewide median values of the social isolation index during 2020 (c) and 2021 (d). (e) Statewide monthly average income in 2020 (USD). (f) Statewide unemployment in 2020.



229 **Summary for the North Region** The North Region is composed of the states of Acre  
230 (AC), Amazonas (AM), Amapá (AP), Pará (PA), Rondônia (RO), Roraima (RR), and To-  
231 cantins (TO). In 2020, it concentrated 8.82% of the Brazilian population besides accounting  
232 for more than 45% of the Brazilian territory, which represented the smallest countrywide  
233 population density [42]. All the states in this region had, in 2020, a monthly average income  
234 smaller than the national average, and the unemployment higher than 10%. In the states  
235 of AC, AM, AP, and RR, the unemployment was higher than the national average of 13.5%  
236 [37, 38]. This indicates that a large proportion of the population in the region is socially  
237 and economically vulnerable. Such issues can have an important role in enhancing the im-  
238 pact of the AE as a social program and as a disease spread mitigation instrument, allowing  
239 individuals in the working age to stay at home.

240 As Figure 1 and Table 1 show, the North region proportionally received the largest amount  
241 of resources from the AE, since a median value of 28.1% (min–max 20.2%–30.2%) received  
242 a monthly income from April to December 2020, with monthly individual mean values of  
243 \$143.91 USD during April to August and \$87.12 BRL during September to December. In  
244 comparison with the monthly average income for each state, such payments represented from  
245 63.7% to 91.8% and 45.2% to 55.2% in the first and the second periods, respectively. This  
246 drop in the monthly value seemed to impact negatively the capacity of individuals to adhere  
247 the social isolation, since, during such period, the social isolation index registered its lowest  
248 values for the majority of the states in the region, as the SII panels in Figures S.1–S.7 show.

249 Except for RR, all the states faced two large waves of infections, the first one starting on  
250 March or April 2020, and ending in August to October 2020. In general, the second wave  
251 started in January 2021, and, in some states, it was still ongoing in May 2021, as Figures S.1–  
252 S.7 illustrate. AE was suspended from January to March 2021, which means that, during  
253 the second wave, the states’ populations were economically vulnerable. This seems to have  
254 impacted social isolation since for the majority of the states in the North region, we could  
255 observe lower SII values during the second waves than in the first ones.

256 During the second wave, the health system in the State of Amazonas collapsed [43, 44],  
257 and a new COVID-19 strain (Gamma), which is potentially more contagious than the original  
258 one, was detected in the same state [45, 46, 47, 48]. Such issues were not sufficient to force the  
259 population in the region to adhere to social isolation at the same levels as the ones observed  
260 during the first waves. A number of reasons can be linked to such behavior, but the absence  
261 of the AE may have had an important impact, especially amongst those in the working age.  
262 One exception was RR that in January to March 2021 presented SII values similar to the ones  
263 observed during the first wave, which seems to have prevented a second wave of infections, as  
264 Figure S.6 illustrates.

265 The correlation between the daily variations in SII and in the reproduction number  $\mathcal{R}(t)$   
266 was mainly negative, indicating that, an increase (or decrease) in SII is linked to a decrease  
267 (or increase) in  $\mathcal{R}(t)$ . The median time between a change in SII to imply a change in  $\mathcal{R}(t)$  in  
268 the North region ranged from 14 days (50% CI: 12–17) in AC and 22 days (50% CI: 12–22)  
269 in AP. Correlation approached zero or became positive basically during periods when SII  
270 reached values below 40% or when SII and  $\mathcal{R}(t)$  stabilized around fixed values. The first case  
271 occurred mainly from August to December, when the payments from the AE were reduced.  
272 The second case occurred mainly during periods when the disease incidence was decreasing,  
273  $\mathcal{R}(t)$  was close to 1.0, and SII was approximately 40% or larger. In these situations, it seems  
274 that SII loses its capacity of making  $\mathcal{R}(t)$  to change, especially if SII is small or large enough.

275 As illustrated by Figure 1 and Table 1, the states with the largest population proportions

276 receiving from the AE were AP and RR, which were exactly the ones that presented the  
277 largest regional numbers of COVID-19 infection per 100K individuals. Curiously, these states  
278 also presented high SII median values during the studied period. The large proportional  
279 number of COVID-19 infections is due to the first wave of infections since both states have  
280 managed to overcome or minimize the effects of a second wave of infections. In these two  
281 cases, the absence of the AE from January to March 2021 seems to have had little impact on  
282 the population adherence to social isolation.

283 Figure 1 and Table 1 also illustrate that AC, AM, AP, and RR had higher unemployment,  
284 lower statewide mean values of monthly income, larger population proportions receiving the  
285 AE in 2020, and larger SII median values. Thus, it seems that there is a relation between  
286 the AE, level of economical exposure, and adherence to social isolation in the following sense;  
287 amongst populations economically vulnerable, the AE has addressed such vulnerability for a  
288 population proportion sufficiently large to impact social isolation.

289 Therefore, the AE was of fundamental importance in providing economic support to fami-  
290 lies during the COVID-19 pandemic, which may have allowed a large proportion of the North  
291 Region population to stay at home, respecting social isolation measures.

292 **Summary for the Northeast Region** The Northeast Region is composed of the states of  
293 Alagoas (AL), Bahia (BA), Ceará (CE), Maranhão (MA), Paraíba (PB), Pernambuco (PE),  
294 Piauí (PI), Rio Grande do Norte (RN) and Sergipe (SE). In 2020, it concentrated 28% of the  
295 Brazilian population besides accounting for 18% of the Brazilian territory.

296 The statewide monthly average incomes varied from \$123.52 USD (MA) to \$196.79 USD  
297 (RN) in 2020. Thus, all the states in this region had in 2020, average incomes considerably  
298 lower than the national average income. Unemployment levels ranged from 12.8% (PI) to  
299 18.58% (AL) in 2020. Except for PI and CE, all the states had unemployment levels higher  
300 than the national average, i.e., 13.5% [37, 38].

301 From May to November 2020, all the states in the Northeast region faced their first  
302 waves of infections, as Figs.S.8–S.16 show. The social isolation index presented small values,  
303 between 38.5% to 40.5% during 2020. It gradually decreased from April to October 2020,  
304 achieving values way below 40% in all states. From September to December 2020, there was  
305 a reduction of 44.0% in the amount paid by the AE. From October to January 2020, SII  
306 gradually increased, reaching approximately 40%. Then, it oscillated around to values below  
307 but close to 40% in March 2021. Such persistent low SII values probably contributed to  
308 the emergence of the second waves that started from November 2020 to January 2021. The  
309 second waves were still ongoing by the end of the period of analysis. For the major part of  
310 the states, the second waves coincided with the suspension of the AE.

311 During 2020, the states in this region registered between 2,310.2 (PE) and 4,851.8 (SE)  
312 infections per 100K individuals, and from January to May 2021 the accumulated cases repre-  
313 sented already 36.8% (MA) and 89.4% (SE) of the registered infections in 2020.

314 From April to December 2020, the median proportion of individuals receiving the AE  
315 varied from 22.87% (AL) to 28.43% (PI). From April to August 2020, the mean monthly  
316 payments ranged from \$151.91 USD (RN) to \$180.48 USD (PE), representing 77.2% and  
317 110.1% of the corresponding statewide average income. From September to December 2020,  
318 the monthly mean amount paid by the program dropped to values ranging from \$82.81 USD  
319 (PI) to \$103.46 USD (PE), representing 52.8% and 63.1% of the corresponding statewide  
320 average income. It is worth noticing that, PE and MA presented the lowest accumulated

321 infections per 100K individuals in 2020.

322 Although presenting the second largest average income in the Northeast region, SE had,  
323 in 2020, the third largest unemployment, 18.4%. The SII in SE was mostly below 40%  
324 in 2020 and 25.2% on average of its population received the AE accordingly to Table S.1.  
325 Such persistent small SII values contributed to the larger accumulated infections per 100K  
326 individuals in 2020.

327 The correlation between the daily variations in SII and in the reproduction number  $\mathcal{R}(t)$   
328 was mainly negative, indicating that, an increase (or decrease) in SII is linked to a decrease  
329 (or increase) in the reproduction number  $\mathcal{R}(t)$ . The mean time between a change in SII to  
330 cause a change in  $\mathcal{R}(t)$  in the Northeast region ranged between 7 days (50% CI: 6–21) in SE  
331 and 25 days (50% CI: 16–30) in MA. During some periods, the correlation became close to  
332 zero or positive, especially in the periods from April to June, from August to October, and in  
333 December 2020. Such periods were also followed by elevated SII values, usually higher than  
334 40%. Such SII values occurred mostly from the beginning of the period of analysis up to June  
335 or August 2020, depending on the state. Possibly the conjunction of the factors, such as  $\mathcal{R}(t)$   
336 larger than one and SII lower than 40% resulted in zero or positive correlation.

337 **Summary for the Central-West Region** The Central-West Region has the second lowest  
338 regionwide population density. It is composed of the Distrito Federal (DF) and the states  
339 of Goiás (GO), Mato Grosso (MT), and Mato Grosso do Sul (MS). In 2020, the statewide  
340 monthly average income varied from \$229.86 USD to \$452.22 USD. Thus, except for Goiás,  
341 all the states had average incomes higher than the national average. Unemployment levels  
342 ranged from 9.73% to 14.75% in 2020. Apart from DF, all the states had a unemployment  
343 lower than the national average, i.e., 13.5% [37, 38].

344 From May to November 2020, all the states faced their first waves of infections, as shown  
345 in Figs. S.18–S.21. The social isolation index gradually decreased from April to October 2020,  
346 reaching values way below 40% in all the states. From October 2020 to January 2021, SII  
347 gradually increased, stabilizing around 40%. Then, it decreased again attaining values below  
348 40% by March 2021. Such persistent low SII values possibly contributed to the emergence of  
349 second waves of infections that started in November 2020 in MS, in January 2021 in GO and  
350 MT, and in middle February 2021 in DF. The second waves were still ongoing by the end of  
351 the period of analysis.

352 As in other regions, the second waves coincided with the period of suspension of the  
353 AE. During 2020, the states of the Central-West region registered from 4,342.0 (GO) to  
354 8,238.6 (DF) accumulated infections per 100K individuals, and from January to May 2021,  
355 the accumulated numbers varied from 84.54% to 108.46% of the registered infections in 2020.

356 From April to December 2020, the statewide median proportions of individuals receiving  
357 the AE varied from 19.1% to 23.6%. From April to August 2020, the mean of the monthly  
358 payments ranged from \$139.53 USD (DF) to \$145.82 USD (GO), then, from September to  
359 December 2020, the monthly mean amount dropped to the range from \$99.05 USD (MS) to  
360 \$105.67 USD (GO). Such values represent from 30.9% to 63.4% of the monthly statewide  
361 average income in the first period and from 23.2% to 46.0% in the second period.

362 The DF presented the largest SII values in 2020 in the region but they were mainly below  
363 40%, which was apparently not enough to prevent a large number of accumulated infections  
364 per 100K individuals. Such difficulty in adhering to social isolation may be linked to a series  
365 of factors. Although DF is a high income region in comparison to other Brazilian states,

366 the statewide rate of unemployment was also elevated in 2020. In addition, DF received the  
367 smallest amount of resources from the AE also in 2020. Possibly, the amount paid by the AE  
368 was not enough to support families, mainly because the income paid was small compared to  
369 the monthly average income in DF. This may have restricted the efficacy of the AE in keeping  
370 individuals at home, contributing to the observed high number of infections in this state.

371 The correlation between the daily variations in SII and in the reproduction number  $\mathcal{R}(t)$   
372 was mainly negative, as expected. The median time between a change in SII to cause a change  
373 in  $\mathcal{R}(t)$  in the Central-West region ranged from 17 days (50% CI: 5–19) in GO to 19 days  
374 (50% CI: 14–27) in MS.

375 For the Center-West states, SII remained mostly below 40%. The loss of correlation  
376 between SII and  $\mathcal{R}(t)$  seems to occur in two situations, namely, when  $\mathcal{R}(t)$  is high, that is,  
377 far above one and SII is below 40 %, or when both  $\mathcal{R}(t)$  and SII are high. The second case  
378 occurred only at the beginning of the outbreak, when SII values were mostly above 40% and  
379 the estimated  $\mathcal{R}(t)$  was higher than one. The first case was more frequent especially between  
380 April to July 2020 and in December 2020. All the states in the Center-West region showed a  
381 loss of correlation in December.

382 The reduction in the values paid by the AE, from September to December 2020, and  
383 the program suspension from January to March 2021 apparently reduced the capacity of  
384 individuals to adhere to social isolation since, during such period, SII values were mainly  
385 lower than 40%. Moreover, when comparing SII values from April to June 2020 with those  
386 from January to March 2021, we noticed a non-negligible reduction, ranging from 17% to  
387 6.3% in the monthly median values, which may have triggered or sustained second waves of  
388 infections.

389 **Summary for the Southeast Region** The Southeast Region has the largest countrywide  
390 population density. It is composed of the states of Espírito Santo (ES), Minas Gerais (MG),  
391 Rio de Janeiro (RJ), and São Paulo (SP). This was also the richest Brazilian region in 2020,  
392 with statewide monthly average incomes ranging from \$240.09 USD in MG to \$331.45 USD in  
393 SP. The 2020 unemployment levels in the region spanned from 12.5% in MG to 17.4% in RJ,  
394 meaning that large proportions of the state populations could be economically vulnerable. In  
395 2020, the AE covered median proportions of 17.7% (min–max 10.6%–20.0%) in SP to 24.4%  
396 (min–max 15.1–27.2%) in ES, paying on average a monthly amount of \$150.12 USD from  
397 April to August and \$111.80 USD from September to December. The drop in the mean  
398 amount was 28.1%, and the mean payments represented proportions ranging from 48.5% to  
399 63.3%, in the first period, and 34.1% to 44.0%, in the second one, of the statewide average  
400 incomes.

401 During the period of study, ES, MG and RJ faced three waves of infections, whereas SP  
402 faced two. The first waves were, in general, long lasting, initiating from March to May 2020  
403 and ending in August to November 2020. Second waves, initiated in November 2020 and,  
404 in general, ended in February 2021. In SP the second wave was still ongoing by the end of  
405 the studied period, i.e., May 2021. Third waves began in February or March 2021 and were  
406 still ongoing by May 2021, i.e., the end of the study period. In the periods between waves of  
407 infections, daily reports remained large, representing non-negligible proportions of the peak  
408 of reports observed during the outbreaks.

409 The SII remained higher than 40% in the beginning of pandemic, mainly from March to  
410 July 2020, and from the end of December 2020 to middle January or middle February 2021,

411 i.e., during the first and the second waves, respectively. SII values observed during the first  
412 waves are considerably larger than the ones observed in the second waves, representing a  
413 reduction from about 6% to approximately 20%, if we compare the median values of SII for  
414 April to June 2020, i.e., the first three months of operation of the AE, with those ones for  
415 January to March 2021, when the program was suspended. This may indicate a difficulty faced  
416 by proportions of individuals to adhere social isolation due to the economical exposure caused  
417 by the risk of unemployment and the absence of a program that could replace incomes during  
418 the lockdown. It is worth mentioning that, from August to December 2020, SII presented its  
419 smallest values, staying for long periods below 40%, which may have triggered the beginning  
420 of second waves and helped to keep the daily reports high during the periods between waves.  
421 In this period the monthly mean payments from the AE were reduced by 28.1%, which may  
422 have reduced the efficacy of the program in supporting those in need since the statewide  
423 monthly average incomes are considerably larger than the program payments.

424 Smaller SII values in 2021 may be linked to the large accumulated numbers of infections  
425 per 100K individuals from January to May 2021, since they already accounted for more than  
426 81.8% in ES and 162.2% in MG of the registered infections in respective states in the whole  
427 2020.

428 As expected, the correlation between the daily variations in SII and in the reproduction  
429 number  $\mathcal{R}(t)$  was mainly negative. The estimated median time between a change in SII  
430 to imply a change in  $\mathcal{R}(t)$  in the Southeast region ranged from 15 days (50% CI: 11–17)  
431 in ES to 20 days (50% CI: 20–22) in MG. Correlation approached zero or became positive  
432 basically during periods when SII reached values below 40% or when SII and  $\mathcal{R}(t)$  stabilized  
433 around fixed values. The first case occurred principally during August to December, when  
434 the payments from the AE were reduced. The second case occurred mainly during periods  
435 when the disease incidence was decreasing,  $\mathcal{R}(t)$  was close to 1.0, and SII was approximately  
436 40% or larger.

437 Figure 1 and Table 1 show that the states with the largest population proportions receiving  
438 the AE were ES and RJ. ES and SP presented the largest regional numbers of COVID-19  
439 infection per 100K individuals in 2020, whereas RJ presented one of the smallest. In 2020, RJ  
440 and SP presented the largest median SII values, whereas from January to March 2021, RJ and  
441 MG presented the largest median values. Although ES was the state with the largest coverage  
442 by the AE, it was the state with the smallest SII median values in 2020 and 2021, possibly due  
443 to the reduction in the monthly amount and the suspension of the social program, exposing  
444 those in need, since this is one of the poorest states in the Southeast region.

445 Figure 1 and Table 1 also illustrate that RJ had the largest unemployment level in 2020,  
446 the second largest coverage by the AE, and the largest median SII values in 2020, indicating  
447 a close relation between the AE and adherence to social isolation. SP also illustrates such  
448 relation, with smaller intensity, whereas in ES we could not identify such relation.

449 **Summary for the South Region** The South Region is composed of the states of Paraná  
450 (PR), Rio Grande do Sul (RS), and Santa Catarina (SC). In 2020, it concentrated 14.3% of  
451 the Brazilian population and accounted for approximately 6.80% of the Brazilian territory  
452 [42]. All the states in this region had, in 2020, monthly average incomes larger than the  
453 national average, ranging from \$275.54 USD in PR to \$321.40 USD in RS, and unemployment  
454 levels smaller than 10% spanning from 6.13% in SC to 9.38% in PR, which is considerably  
455 smaller than the countrywide rate, i.e., 13.5% [37, 38]. This means that, in comparison to

456 other Brazilian regions, a smaller proportion of its population is economically and socially  
457 vulnerable, which leads us to expect a limited impact of the AE on influencing adherence to  
458 social isolation.

459 In 2020, South region proportionally received the smallest amount of resources from the  
460 AE, with median values of statewide population proportions ranging from 16.3% (min–max  
461 9.22%–19.3%) in SC to 19.8% (min–max 11.6–22.3%) in PR, paying in mean a monthly  
462 amount of \$141.15 USD during April to August and \$106.66 USD during September to De-  
463 cember. The drop in the mean amount was 24.4%, and the mean payments represented pro-  
464 portions of the statewide average incomes ranging from 43.9% to 51.8%, in the first period,  
465 and 32.8% to 38.3%, in the second one. In PR and RS, larger proportions of the population  
466 received the AE, larger median values of the social isolation index were observed, and smaller  
467 numbers of COVID-19 infections per 100K individuals were registered, when compared to  
468 SC, as Figure 1 and Table 1 show.

469 For all states, it was possible to observe three large waves of infections occurring almost  
470 simultaneously. The first waves occurred from April to October 2020, the second from Novem-  
471 ber 2020 to January 2021, and the third from February to April 2021, as Figures S.26–S.28  
472 illustrate. In general, the second and third waves were considerably larger than the first one,  
473 and, after larger outbreaks, the daily reports stabilized at numbers larger than the peak of  
474 the first wave. In other words, in this region, COVID-19 incidence was high, despite the  
475 reproduction number values stayed close to one during such periods.

476 The social isolation index presented similar values during the major outbreaks, regardless  
477 the presence of the AE, as expected, since the regional population is less economically vul-  
478 nerable. States with larger proportions covered by the program presented larger SII values  
479 and smaller numbers of COVID-19 infections per 100K individuals in 2020. Moreover, SII  
480 remained higher than 40% at the beginning of the pandemic, mainly from March to July 2020,  
481 and from December 2020 to January or middle February 2021, i.e., during the first and the  
482 second waves, respectively. As in other regions, the SII values observed during the first waves  
483 were larger than the ones observed in the second waves, representing reductions from about  
484 2% to approximately 19.5%, if we compare the median values of SII for April to June 2020,  
485 with those ones for January to March 2021. From August to December 2020, SII presented  
486 its smallest values, staying below 40%. Such period coincides with the one when the monthly  
487 mean payments from the AE were reduced by 24.4%.

488 As previously, smaller SII values in 2021 may be linked to the large accumulated numbers  
489 of infections at the beginning of 2021 (January to May), since they already accounted for  
490 more than 85.7% in SC and 138.3% in PR of the accumulated numbers per 100K individuals  
491 in respective states in the whole 2020.

492 Unemployment seemed to be linked to the AE coverage since for the states with a smaller  
493 unemployment level in 2020, smaller population proportions were covered by the program.  
494 On the other hand, monthly average income seemed to have little relation to the program  
495 coverage in the region, as we can observe in Figure 1 and Table 1.

496 The correlation between the daily variations in SII and in the reproduction number  $\mathcal{R}(t)$   
497 was again mainly negative. The estimated median time between a change in SII to imply  
498 in a change in  $\mathcal{R}(t)$  in the South region was between 14 days (50% CI: 14–15) in PR and  
499 28 days (50% CI: 28–28) in RS. As in other Brazilian regions, correlation approached zero  
500 or became positive basically during periods when SII reached values below 40% or when SII  
501 and  $\mathcal{R}(t)$  stabilized around fixed values. The first case generally occurred during the period  
502 from August to December, when the payments from the AE were reduced. The second case

503 occurred basically during periods when the disease incidence was decreasing,  $\mathcal{R}(t)$  was close  
504 to 1.0, and SII was approximately 40% or larger.

### 505 3.1 The Impact of the AE on the Numbers of COVID-19 Cases and Deaths

506 During 2020, social isolation prevailed as one of the main diseases spread contention measures,  
507 helping to reduce the numbers of infections and deaths, as illustrated by the mainly negative  
508 values of the estimated correlation between the social isolation index and the reproduction  
509 number. The capability of adhering to social isolation is deeply affected by the individual's  
510 economical and social status. Thus, social programs, like the AE, that provide income for  
511 those in need, help to allow individuals to stay at home, acting as a support to other disease  
512 contention measures.

513 By comparing the observed social isolation index values from April to August 2020 with  
514 those from January to March 2021, we could see remarkable reductions during the second  
515 period, reaching more than 20% in some states. This pattern can be related to several  
516 reasons including the AE, since, during the first period, the program was fully operational  
517 and in the second, it was suspended. Moreover, the first period includes the beginning of the  
518 first wave of infections in all states, whereas the second period includes the second or third  
519 waves.

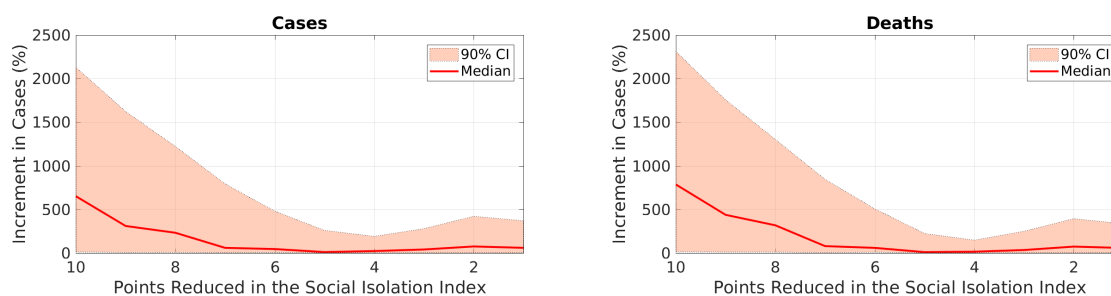

Figure 2: Increment in the accumulated number of cases and deaths in the period 01-April-2020 to 31-Aug-2020 if the Social Isolation Index is reduced in 1 to 10 points in Brazil. The dashed lines represent the 90% confidence interval.

520 To estimate the impact of the AE on controlling disease spread, we evaluated the potential  
521 accumulated COVID-19 infections from April to August 2020 if the social isolation index is  
522 reduced from 1.00 to 10.0 for each state. Such reduction values are related to the reduction  
523 observed when comparing SII values observed in the periods when the periods mentioned  
524 above, i.e, when the program was fully operational and when it was suspended. Table 2 and  
525 Figure 2 show the percentage of additional accumulated infections and deaths corresponding  
526 to the reductions in SII for the whole country. As the results show, the incremental numbers  
527 are considerably larger than the reports, illustrating the importance of social distancing and  
528 programs such as the AE to support disease spread control.

## 529 4 Discussion

530 From March 2020 to May 2021, we observed two waves of COVID-19 infections in the majority  
531 of the states of the North, Northeast, and Central-West regions. On the other hand, almost all

| Reduction | Cases (90% CI)      | Deaths (90% CI)     |
|-----------|---------------------|---------------------|
| -1.00     | 58.7% (2.76%–369%)  | 56.9% (2.50%–335%)  |
| -2.00     | 74.5% (0.36%–421%)  | 72.9% (0.92%–393%)  |
| -3.00     | 39.8% (0.93%–279%)  | 33.6% (1.07%–249%)  |
| -4.00     | 21.8% (0.33%–190%)  | 14.6% (0.24%–147%)  |
| -5.00     | 10.2% (0.36%–259%)  | 9.58% (0.22%–224%)  |
| -6.00     | 44.7% (5.94%–480%)  | 58.3% (9.29%–506%)  |
| -7.00     | 58.5% (2.77%–793%)  | 78.4% (4.22%–845%)  |
| -8.00     | 232% (7.83%–1,223%) | 317% (0.42%–1,303%) |
| -9.00     | 309% (6.68%–1,623%) | 437% (10.8%–1,757%) |
| -10.0     | 651% (12.5%–2,131%) | 785% (14.6%–2,312%) |

Table 2: Increment in the accumulated number of cases and deaths in the period from 01-April-2020 to 31-Aug-2020 if the Social Isolation Index is reduced in 1 to 10 points in Brazil. The numbers in the parentheses are 90% confidence intervals.

532 the States in the Southeast and South regions faced three waves of infection. The adherence  
533 to social isolation varied considerably across the country and time, but we observed similar  
534 patterns in the SII values. At the beginning of the first waves of infections, SII values were  
535 considerably higher than in other periods, even during secondary waves, where generally large  
536 numbers of infections were reported.

537 During the first waves, the AE was fully operational and reached a large fraction of the  
538 Brazilian population, paying a substantial proportion of the statewide average incomes. It  
539 probably helped individuals to stay at home, adhering to social isolation. Moreover, the  
540 period of reduction in the COVID-19 cases and the amount paid by the program generally  
541 coincided. It may have motivated people to leave social isolation, increasing SII values and  
542 triggering secondary waves of infections. From January to March 2021, when the program  
543 suspension occurred, second or third waves were ongoing in many states in the country. Maybe  
544 it may have made adherence to social isolation difficult, especially for those unemployed or  
545 precarious workers. In consequence, in this period, the SII values remained considerably lower  
546 than during the first wave.

547 The correlation between changes in the reproduction number and SII values was mainly  
548 negative in all states. Thus, if SII drops, we must expect that the reproduction number  
549 will rise. We also observed considerable delays between a rise in SII to cause a drop in the  
550 reproduction number. Moreover, such relation can also be lost when SII is low or the disease  
551 incidence is high.

552 In general, states with lower average income, in general, received proportionally more  
553 resources from the AE and presented higher SII values and lower numbers of accumulated  
554 infections per 100K individuals.

555 Based on the differences between the SII values observed in the first waves and those from  
556 January to March 2021, we estimated the accumulated numbers of infections and deaths  
557 from April to August 2020 if SII is reduced from 1 to 10 points. Based on these estimates, we  
558 found that the AE probably avoided a considerable number of infections and deaths during  
559 the referred period, when the program was fully operational.

560 It is worth mentioning that the proposed methodology has some limitations. We cannot  
561 assert that the presence or the absence of the AE was the main factor in promoting adherence



562 to social isolation. Other factors, such as the fear of an emerging deadly disease, may have  
563 helped to convince people to stay at home at the beginning of the outbreak. Also, psycho-  
564 logical saturation can be one of the main reasons why people leave isolation. These factors  
565 are hard to include in a model and can affect the cause and effect relationship between so-  
566 cioeconomic programs and social isolation, as well as the disease spread. More sophisticated  
567 statistical tools can be used to investigate further such causal relationships, and they are the  
568 subject of future work.

569 Different measures of mobility mainly based on mobile phone information were used to  
570 infer the real impact of initiatives like lockdowns on the contention of outbreaks [22, 24, 25, 26],  
571 as well as to describe the Spatio-temporal dynamics of the disease [19, 20, 23, 27, 28]. In the  
572 present work, we intended to shed light on the impact of a national socioeconomic program on  
573 disease spread contention, based on the premise that social isolation implies disease spread  
574 contention. As mentioned above, such a premise was widely tested and illustrated by our  
575 results.

## 576 5 Concluding Remarks

577 In 2020, the AE covered a median proportion of 22.1% (min–max: 14.7%–24.1%) of the  
578 Brazilian population providing income for those in need, under a nationwide unemployment  
579 of 13.5%. Comparing the SII values for the period when the socioeconomic program was  
580 fully operational with the period when it was not, we observe a significantly higher adherence  
581 to social isolation in the first period for the majority of the Brazilian states. It made us  
582 believe that the AE played a significant role in helping people to adhere to social isolation,  
583 helping to reduce the virus spread. Of course, there are other possible reasons for such  
584 differences in social isolation patterns since, during secondary waves, COVID-19 was not  
585 a novelty anymore. However, even during the collapse of the health system in Manaus in  
586 January 2021 and the introduction of a new virus strain potentially more contagious, the SII  
587 values were considerably smaller during the second or third waves in all Brazilian states.

588 We used such differences in SII values to estimate the impact of the absence of the AE,  
589 and concluded that the program potentially avoided a considerable number of COVID-19  
590 infections and related deaths. The socioeconomic program provided income to a substan-  
591 tial proportion of the Brazilian population, including unemployed individuals and precarious  
592 workers, allowing them to stay at home. Without such resources, they would be gathering  
593 and helping the virus to spread. When the program was operational was sufficient to give  
594 time for public authorities to prepare the Brazilian health system to treat those with severe  
595 or critical symptoms.

596 Thus, if non-pharmaceutical measures, like lockdowns, are the only available ways to con-  
597 trol an outbreak, socioeconomic programs can play an important supporting role by providing  
598 conditions to proportions of the population to adhere to social isolation. Coordinating such  
599 programs with sufficiently elevated coverage during a health crisis is a daunting task, but it  
600 can be crucial to make disease spread control succeed.

## 601 Data Availability

602 The datasets analyzed and used during the present study are available in [5, 7, 29, 36, 37, 38].

## 603 Code Availability

604 The codes in MATLAB (The MathWorks, Inc., Natick, USA) used in this study can be found  
605 in the GitHub repository <https://github.com/viniciusalbani/AuxilioEmergencial>.

## 606 References

- 607 [1] WHO Coronavirus (COVID-19) Dashboard;. <https://covid19.who.int/> [Accessed 10-  
608 11-2021].
- 609 [2] World Economic Outlook Update;. [https://www.imf.org/en/Publications/WEO/  
610 Issues/2021/01/26/2021-world-economic-outlook-update](https://www.imf.org/en/Publications/WEO/Issues/2021/01/26/2021-world-economic-outlook-update) [Accessed 11-06-2021].
- 611 [3] Google Finance;. <https://www.google.com/finance/> [Accessed on 10-11-2021].
- 612 [4] Auxílio Emergencial 2021: veja perguntas e respostas;. [https://  
613 //g1.globo.com/economia/auxilio-emergencial/noticia/2021/03/23/  
614 auxilio-emergencial-2021-veja-perguntas-e-respostas.ghtml](https://g1.globo.com/economia/auxilio-emergencial/noticia/2021/03/23/auxilio-emergencial-2021-veja-perguntas-e-respostas.ghtml) [Accessed 17-  
615 05-2021].
- 616 [5] Portal da Transparência;. [http://www.portaltransparencia.gov.br/  
617 download-de-dados/auxilio-emergencial](http://www.portaltransparencia.gov.br/download-de-dados/auxilio-emergencial) [Accessed 08-05-2021].
- 618 [6] Diário Oficial da União;. [https://www.in.gov.br/web/dou/-/  
619 medida-provisoria-n-919-de-30-de-janeiro-de-2020-240824899](https://www.in.gov.br/web/dou/-/medida-provisoria-n-919-de-30-de-janeiro-de-2020-240824899) [Accessed  
620 12-05-2021].
- 621 [7] Produto Interno Bruto - PIB;. <https://www.ibge.gov.br/explica/pib.php> [Accessed  
622 12-05-2021].
- 623 [8] Niedzwiedz CL, O'Donnell CA, Jani BD, Demou E, Ho FK, Celis-Morales C, et al. Ethnic  
624 and socioeconomic differences in SARS-CoV-2 infection: prospective cohort study using  
625 UK Biobank. *BMC Medicine*. 2020;18:1–14.
- 626 [9] Hoebel J, Michalski N, Wachtler B, Diercke M, Neuhauser H, Wieler LH, et al. So-  
627 cioeconomic differences in the risk of infection during the second SARS-CoV-2 wave in  
628 Germany. *Deutsches Ärzteblatt International*. 2021;118(15):269–270.
- 629 [10] Shaw JA, Meiring M, Cummins T, Chegou NN, Claassen C, Du Plessis N, et al. Higher  
630 SARS-CoV-2 seroprevalence in workers with lower socioeconomic status in Cape Town,  
631 South Africa. *Plos one*. 2021;16(2):e0247852.
- 632 [11] Horta BL, Silveira MF, Barros AJ, Barros FC, Hartwig FP, Dias MS, et al. Prevalence  
633 of antibodies against SARS-CoV-2 according to socioeconomic and ethnic status in a  
634 nationwide Brazilian survey. *Revista Panamericana de Salud Pública*. 2020;44:e135.
- 635 [12] Allan-Blitz LT, Goldbeck C, Hertlein F, Turner I, Klausner JD. Association of Lower  
636 Socioeconomic Status and SARS-CoV-2 Positivity in Los Angeles, California. *Journal of  
637 Preventive Medicine and Public Health*. 2021;54(3):161–165.

- 638 [13] Kissler SM, Kishore N, Prabhu M, Goffman D, Beilin Y, Landau R, et al. Reductions in  
639 commuting mobility correlate with geographic differences in SARS-CoV-2 prevalence in  
640 New York City. *Nature Communications*. 2020;11(1):1–6.
- 641 [14] Larrosa JM. SARS-CoV-2 in Argentina: Lockdown, mobility, and contagion. *Journal of*  
642 *Medical Virology*. 2021;93(4):2252–2261.
- 643 [15] Kishore N, Kahn R, Martinez PP, De Salazar PM, Mahmud AS, Buckee CO. Lockdowns  
644 result in changes in human mobility which may impact the epidemiologic dynamics of  
645 SARS-CoV-2. *Scientific Reports*. 2021;11:6995.
- 646 [16] Erim DO, Oke GA, Adisa AO, Odukoya O, Ayo-Yusuf OA, Erim TN, et al. Associations  
647 of Government-Mandated Closures and Restrictions With Aggregate Mobility Trends  
648 and SARS-CoV-2 Infections in Nigeria. *JAMA Network Open*. 2021;4(1):e2032101.
- 649 [17] Rüdiger S, Konigorski S, Rakowski A, Edelman JA, Zernick D, Thieme A, et al. Predict-  
650 ing the SARS-CoV-2 effective reproduction number using bulk contact data from mobile  
651 phones. *Proceedings of the National Academy of Sciences*. 2021;118(31):e2026731118.
- 652 [18] Mehta SH, Clipman SJ, Wesolowski A, Solomon SS. Holiday gatherings, mobility and  
653 SARS-CoV-2 transmission: results from 10 US states following Thanksgiving. *Scientific*  
654 *Reports*. 2021;11:17328.
- 655 [19] Candido DS, Claro IM, De Jesus JG, Souza WM, Moreira FR, Dellicour S, et al. Evolu-  
656 tion and epidemic spread of SARS-CoV-2 in Brazil. *Science*. 2020;369(6508):1255–1260.
- 657 [20] Bisanzio D, Kraemer MU, Brewer T, Brownstein JS, Reithinger R. Geolocated Twitter  
658 social media data to describe the geographic spread of SARS-CoV-2. *Journal of Travel*  
659 *Medicine*. 2020;27(5):taaa120.
- 660 [21] Tomori DV, Rübsamen N, Berger T, Scholz S, Walde J, Wittenberg I, et al. Individual  
661 social contact data and population mobility data as early markers of SARS-CoV-2 trans-  
662 mission dynamics during the first wave in Germany—an analysis based on the COVIMOD  
663 study. *BMC medicine*. 2021;19:271.
- 664 [22] Li Y, Wang X, Campbell H, Nair H, for COVID UN, et al. The association of community  
665 mobility with the time-varying reproduction number (R) of SARS-CoV-2: a modelling  
666 study across 330 local UK authorities. *The Lancet Digital Health*. 2021;3(10):e676–e683.
- 667 [23] Alleman TW, Vergeynst J, De Visscher L, Rollier M, Torfs E, Nopens I, et al. As-  
668 sessing the effects of non-pharmaceutical interventions on SARS-CoV-2 transmission in  
669 Belgium by means of an extended SEIQRD model and public mobility data. *Epidemics*.  
670 2021;37:100505.
- 671 [24] Lison A, Persson J, Banholzer N, Feuerriegel S. Estimating the effect of mobility on  
672 SARS-CoV-2 transmission during the first and second wave of the COVID-19 epidemic  
673 in Switzerland: a population-based study; 2021. *MedRxiv preprint*.
- 674 [25] Brown KA, Soucy JPR, Buchan SA, Sturrock SL, Berry I, Stall NM, et al. The mobility  
675 gap: estimating mobility thresholds required to control SARS-CoV-2 in Canada. *CMAJ*.  
676 2021;193(17):E592–E600.

- 677 [26] Tobías A. Evaluation of the lockdowns for the SARS-CoV-2 epidemic in Italy and Spain  
678 after one month follow up. *Science of the Total Environment*. 2020;725:138539.
- 679 [27] Coelho FC, Lana RM, Cruz OG, Villela DA, Bastos LS, Pastore y Piontti A, et al.  
680 Assessing the spread of COVID-19 in Brazil: Mobility, morbidity and social vulnerability.  
681 *PLoS One*. 2020;15(9):e0238214.
- 682 [28] Peixoto PS, Marcondes D, Peixoto C, Oliva SM. Modeling future spread of infections  
683 via mobile geolocation data and population dynamics. An application to COVID-19 in  
684 Brazil. *PloS One*. 2020;15(7):e0235732.
- 685 [29] Mapa Brasileiro da COVID;. <https://mapabrasileirodacovid.inloco.com.br/pt/>  
686 [Accessed 13-05-2021]. Available from: [https://mapabrasileirodacovid.inloco.com.](https://mapabrasileirodacovid.inloco.com.br/pt/)  
687 [br/pt/](https://mapabrasileirodacovid.inloco.com.br/pt/).
- 688 [30] Albani VVL, Velho RM, Zubelli JP. Estimating, Monitoring, and Forecasting the Covid-  
689 19 Epidemics: A Spatio-Temporal Approach Applied to NYC Data. *Scientific Reports*.  
690 2021;p. 9089.
- 691 [31] Diekmann O, Heesterbeek JAP, Metz JAJ. On the definition and the computation  
692 of the basic reproduction Ratio  $R_0$  in models for infectious- diseases in heterogeneous  
693 populations. *Journal of Mathematical Biology*. 1990;28(4):365–382.
- 694 [32] Lauer SA, Grantz KH, Bi Q, Jones FK, Zheng Q, Meredith HR, et al. The Incubation  
695 Period of Coronavirus Disease 2019 (COVID-19) From Publicly Reported Confirmed  
696 Cases: Estimation and Application. *Annals of Internal Medicine*. 2020;172(9):577–583.
- 697 [33] Albani VVL, Loria J, Massad E, Zubelli JP. COVID-19 Underreporting and its Impact  
698 on Vaccination Strategies. *BMC Infectious Diseases*. 2021;21:1111.
- 699 [34] Albani V, Loria J, Massad E, Zubelli JP. The Impact of COVID-19 Vaccination De-  
700 lay: A Data-Driven Modelling Analysis for Chicago and New York City. *Vaccine*.  
701 2021;39(41):6088–6094.
- 702 [35] Albani V, De Cezaro A. A Connection Between Uniqueness of Minimizers and Morozov-  
703 like Discrepancy Principles in Tikhonov-type Regularization. *Inverse Probl Imaging*.  
704 2019;13(1):211–229.
- 705 [36] Painel Coronavírus;. <https://covid.saude.gov.br/> [Accessed 11-05-2021].
- 706 [37] Com pandemia, 20 estados têm taxa média de desem-  
707 prego recorde em 2020 ;. [https://agenciadenoticias.ibge.](https://agenciadenoticias.ibge.gov.br/agencia-noticias/2012-agencia-de-noticias/noticias/30235-com-pandemia-20-estados-tem-taxa-media-de-desemprego-recorde-em-2020)  
708 [gov.br/agencia-noticias/2012-agencia-de-noticias/noticias/](https://agenciadenoticias.ibge.gov.br/agencia-noticias/2012-agencia-de-noticias/noticias/30235-com-pandemia-20-estados-tem-taxa-media-de-desemprego-recorde-em-2020)  
709 [30235-com-pandemia-20-estados-tem-taxa-media-de-desemprego-recorde-em-2020](https://agenciadenoticias.ibge.gov.br/agencia-noticias/2012-agencia-de-noticias/noticias/30235-com-pandemia-20-estados-tem-taxa-media-de-desemprego-recorde-em-2020)  
710 [Accessed 31-05-2021].
- 711 [38] Renda domiciliar per capita 2020;. [https://ftp.ibge.gov.br/Trabalho\\_e\\_](https://ftp.ibge.gov.br/Trabalho_e_Rendimento/Pesquisa_Nacional_por_Amostra_de_Domicilios_continua/Renda_domiciliar_per_capita/Renda_domiciliar_per_capita_2020.pdf)  
712 [Rendimento/Pesquisa\\_Nacional\\_por\\_Amostra\\_de\\_Domicilios\\_continua/Renda\\_](https://ftp.ibge.gov.br/Trabalho_e_Rendimento/Pesquisa_Nacional_por_Amostra_de_Domicilios_continua/Renda_domiciliar_per_capita/Renda_domiciliar_per_capita_2020.pdf)  
713 [domiciliar\\_per\\_capita/Renda\\_domiciliar\\_per\\_capita\\_2020.pdf](https://ftp.ibge.gov.br/Trabalho_e_Rendimento/Pesquisa_Nacional_por_Amostra_de_Domicilios_continua/Renda_domiciliar_per_capita/Renda_domiciliar_per_capita_2020.pdf) [Accessed 31-05-  
714 2021].

- 715 [39] Anuário Brasileiro da Educação Básica 2020;. <https://www.moderna.com.br/716 anuario-educacao-basica/2020/escolaridade.html> [Accessed 11-06-2021].
- 717 [40] Chowell G. Fitting dynamic models to epidemic outbreaks with quantified uncertainty: 718 a primer for parameter uncertainty, identifiability, and forecasts. *Infectious Disease Mod-* 719 *elling*. 2017;2(3):379–398.
- 720 [41] Compare a evolução do número de vacinados no Brasil com a de 721 outros países; 2021. <https://www.poder360.com.br/coronavirus/722 compare-a-evolucao-do-numero-de-vacinados-no-brasil-com-a-de-outros-paises/723> [Accessed on 23-11-2021].
- 724 [42] Estimativas da População;. <https://agenciadenoticias.ibge.gov.br/agencia-noticias/2012-agencia-de-noticias/noticias/725 30235-com-pandemia-20-estados-tem-taxa-media-de-desemprego-recorde-em-2020726> [Accessed 31-05-2021].
- 728 [43] COVID-19 leaves Amazonas health system saturated, overloaded and struggling;. <https://www.msf.org/coronavirus-covid-19-collapses-health-system-manaus-brazil729> [Accessed 18-05-2021].
- 731 [44] Manaus, Brazil, hospital system collapsing, oxygen lacking in 732 COVID surge: minister;. <https://www.reuters.com/article/us-health-coronavirus-brazil-manaus-idUSKBN29J2Y0733> [Accessed 18-05-2021].
- 734 [45] Amazon strain of coronavirus already predominates in cases of COVID- 735 19 in a city 2,500 km from Manaus;. <https://agencia.fapesp.br/amazon-strain-of-coronavirus-already-predominates-in-cases-of-covid-19-in-a-city-2500736 35416/> [Accessed 18-05-2021].
- 738 [46] New COVID-19 variant identified in Brazilian Amazon spreads 739 faster;. <https://www.news-medical.net/news/20210201/New-COVID-19-variant-identified-in-Brazilian-Amazon-spreads-faster.aspx740> [Accessed 18-05-2021].
- 742 [47] COVID-19 variant in Brazilian Amazon spreads faster;. <https://www.aa.com.tr/en/americas/covid-19-variant-in-brazilian-amazon-spreads-faster/2123587743> [Ac- 744 cessed 18-05-2021].
- 745 [48] Fiocruz Amazon confirms reinfection by a new variation 746 of the Sars-CoV-2;. <https://portal.fiocruz.br/en/news/fiocruz-amazon-confirms-reinfection-new-variation-sars-cov-2747> [Accessed 748 18-05-2021].

## 749 Acknowledgments

750 VA acknowledges the financial support from Fundação Butantan through the Grant 01/2020.  
751 RA acknowledges the financial support from Fundação Carlos Chagas Filho de Amparo à  
752 Pesquisa do Estado do Rio de Janeiro (FAPERJ) through the grants E-26/202.932/2019 and

753 E-26/202.933/2019. EM acknowledges the financial support from Conselho Nacional de De-  
754 senvolvimento Científico e Tecnológico (CNPq) and Fundação Butantan through the Grants  
755 305544/2011-0 and 01/2020, respectively. JZ acknowledges the financial support from Khal-  
756 ifa University, CNPq, and Fundação Carlos Chagas Filho de Amparo à Pesquisa do Estado  
757 do Rio de Janeiro through the Grants FSU-2020-09, 307873/2013-7, and E-26/202.927/2017,  
758 respectively. All the authors thank Edilson Moura from Incognia ([incognia.com](http://incognia.com)) for sharing  
759 the Social Isolation Index dataset.

## 760 **Author contributions statement**

761 V.A., E.M., and J.Z. designed research; V.A. and R.A. performed the research; V.A., R.A.,  
762 and N.B. analyzed data; all the authors wrote the paper.

## 763 **Competing interests**

764 The authors declare no competing interests.
