# Supplementary material for: On the Role of Financial Support Programs in Mitigating the Sars-CoV-2 Spread in Brazil
Source: bioRxiv or medRxiv preprint supplement (doi:10.1101/2021.11.30.21267063), 2021-11-30
Supplement: Supplementary file [file media-1.pdf]

**Supplementary Material to:  
On the Role of Financial Support Programs in  
Mitigating the Sars-CoV-2 Spread in Brazil**

Vinicius V. L. Albani<sup>1</sup>, Roseane Albani<sup>2</sup>, Nara Bobko<sup>3</sup>, Eduardo Massad<sup>4 5</sup> and  
Jorge P. Zubelli<sup>6</sup>

November 27, 2021

<sup>1</sup>Department of Mathematics, Federal University of Santa Catarina, Florianopolis, Brazil,  
[v.albani@ufsc.br](mailto:v.albani@ufsc.br)

<sup>2</sup>Instituto Politecnico do Rio de Janeiro, State University of Rio de Janeiro, Nova Friburgo, Brazil,  
[roseanealves75@gmail.com](mailto:roseanealves75@gmail.com)

<sup>3</sup>Federal University of Technology - Paraná, Curitiba, Brazil, [narabobko@gmail.com](mailto:narabobko@gmail.com)

<sup>4</sup>School of Medicine, University of São Paulo and LIM01-HCFMUSP, São Paulo, Brazil

<sup>5</sup>School of Applied Mathematics, Fundação Getúlio Vargas, Rio de Janeiro, Brazil,  
[eduardo.massad@fgv.br](mailto:eduardo.massad@fgv.br)

<sup>6</sup>Mathematics Department, Khalifa University, Abu Dhabi, UAE, [jorge.zubelli@ku.ac.ae](mailto:jorge.zubelli@ku.ac.ae)

# 1 North Region

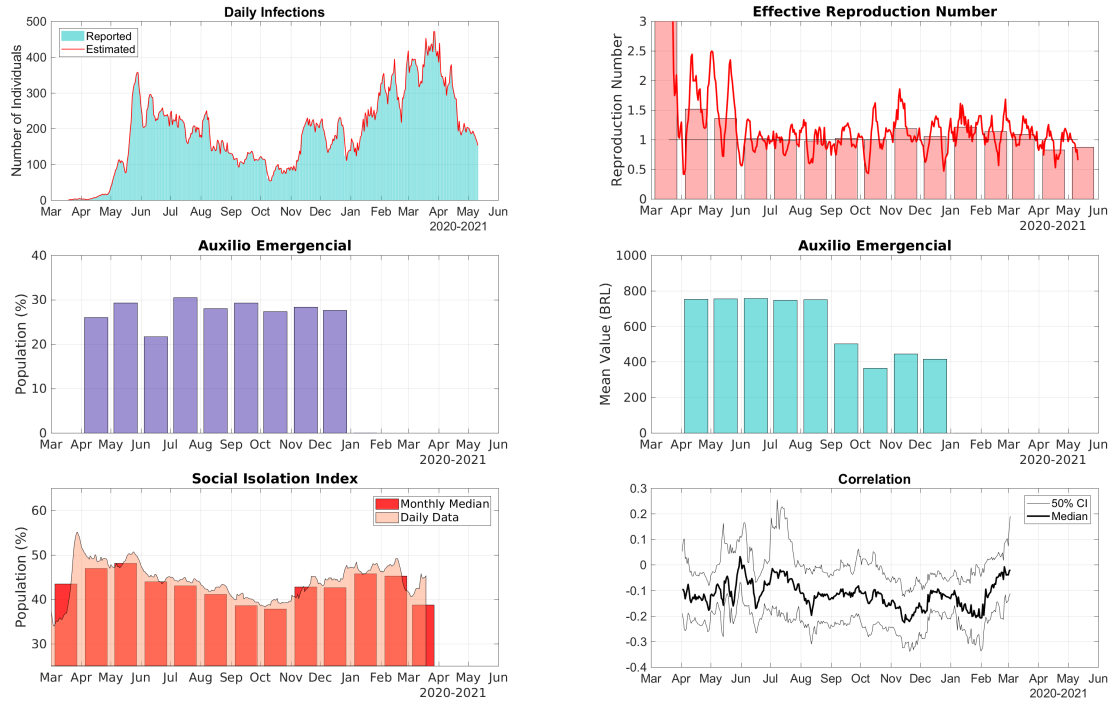

Figure S.1: Data for the State of Acre in the North Region of Brazil. Top Row, Right: comparison between the 7-day moving average of daily reports of infections and model predictions (right). Top Row, Left: The solid line represents the time-dependent reproduction number and the bars are the corresponding monthly median values. Middle Row, Right: The bars represent the proportions of the State population receiving the Auxílio Emergencial by month. Middle Row, Left: The bars represent the statewide average amount paid by Auxílio Emergencial each month. Bottom Row, Left: The area graph is the 7-day moving average of the social isolation index and the bars represent the corresponding monthly median values. Bottom Row, Right: Correlation between the daily increments of the social isolation index and the reproduction number.

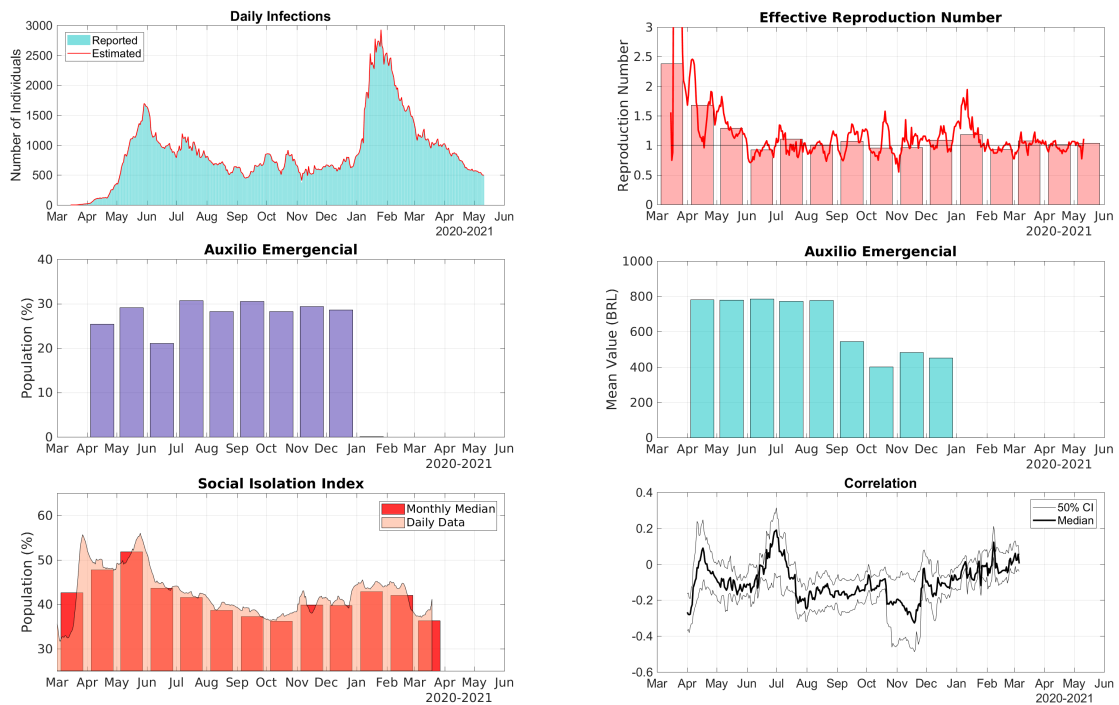

Figure S.2: Data for the State of Amazonas in the North Region of Brazil. Top Row, Right: comparison between the 7-day moving average of daily reports of infections and model predictions (right). Top Row, Left: The solid line represents the time-dependent reproduction number and the bars are the corresponding monthly median values. Middle Row, Right: The bars represent the proportions of the State population receiving the Auxílio Emergencial by month. Middle Row, Left: The bars represent the statewide average amount paid by Auxílio Emergencial each month. Bottom Row, Left: The area graph is the 7-day moving average of the social isolation index and the bars represent the corresponding monthly median values. Bottom Row, Right: Correlation between the daily increments of the social isolation index and the reproduction number.

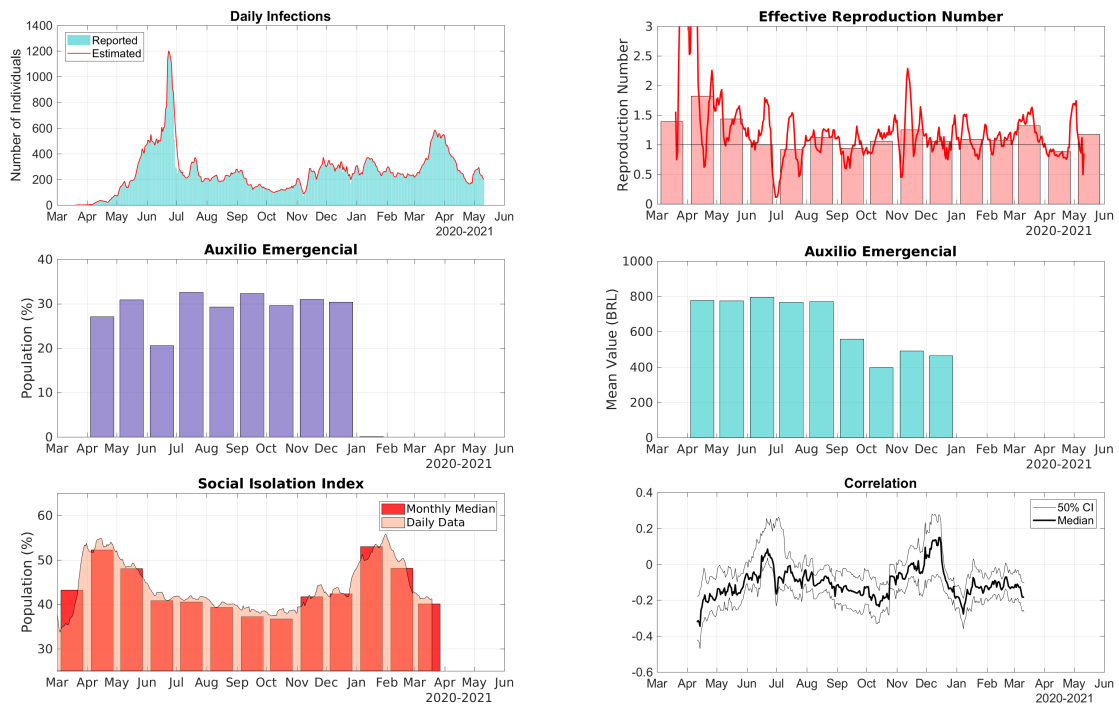

Figure S.3: Data for the State of Amapá in the North Region of Brazil. Top Row, Right: comparison between the 7-day moving average of daily reports of infections and model predictions (right). Top Row, Left: The solid line represents the time-dependent reproduction number and the bars are the corresponding monthly median values. Middle Row, Right: The bars represent the proportions of the State population receiving the Auxílio Emergencial by month. Middle Row, Left: The bars represent the statewide average amount paid by Auxílio Emergencial each month. Bottom Row, Left: The area graph is the 7-day moving average of the social isolation index and the bars represent the corresponding monthly median values. Bottom Row, Right: Correlation between the daily increments of the social isolation index and the reproduction number.

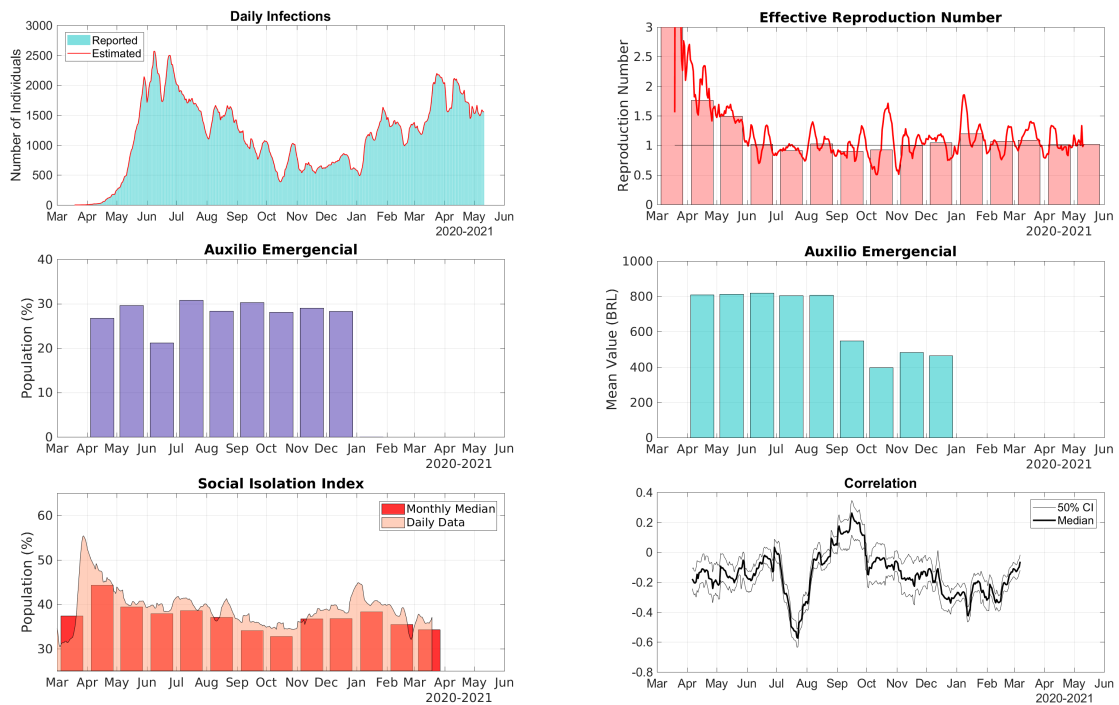

Figure S.4: Data for the State of Pará in the North Region of Brazil. Top Row, Right: comparison between the 7-day moving average of daily reports of infections and model predictions (right). Top Row, Left: The solid line represents the time-dependent reproduction number and the bars are the corresponding monthly median values. Middle Row, Right: The bars represent the proportions of the State population receiving the Auxílio Emergencial by month. Middle Row, Left: The bars represent the statewide average amount paid by Auxílio Emergencial each month. Bottom Row, Left: The area graph is the 7-day moving average of the social isolation index and the bars represent the corresponding monthly median values. Bottom Row, Right: Correlation between the daily increments of the social isolation index and the reproduction number.

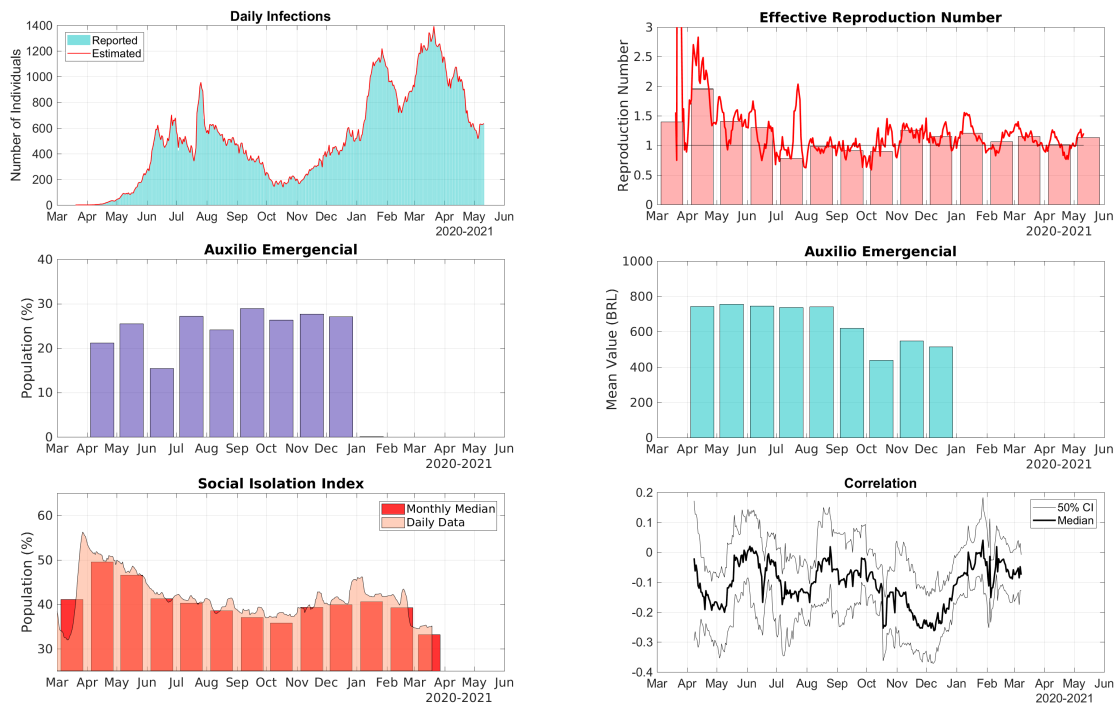

Figure S.5: Data for the State of Rondônia in the North Region of Brazil. Top Row, Right: comparison between the 7-day moving average of daily reports of infections and model predictions (right). Top Row, Left: The solid line represents the time-dependent reproduction number and the bars are the corresponding monthly median values. Middle Row, Right: The bars represent the proportions of the State population receiving the Auxílio Emergencial by month. Middle Row, Left: The bars represent the statewide average amount paid by Auxílio Emergencial each month. Bottom Row, Left: The area graph is the 7-day moving average of the social isolation index and the bars represent the corresponding monthly median values. Bottom Row, Right: Correlation between the daily increments of the social isolation index and the reproduction number.

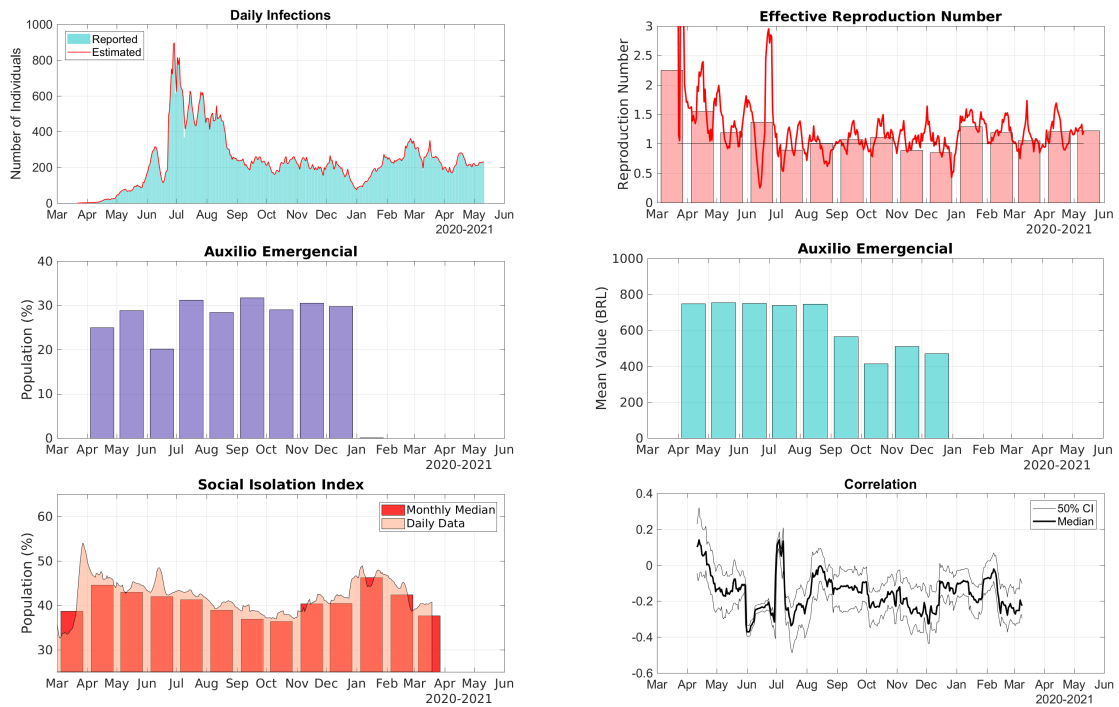

Figure S.6: Data for the State of Roraima in the North Region of Brazil. Top Row, Right: comparison between the 7-day moving average of daily reports of infections and model predictions (right). Top Row, Left: The solid line represents the time-dependent reproduction number and the bars are the corresponding monthly median values. Middle Row, Right: The bars represent the proportions of the State population receiving the Auxílio Emergencial by month. Middle Row, Left: The bars represent the statewide average amount paid by Auxílio Emergencial each month. Bottom Row, Left: The area graph is the 7-day moving average of the social isolation index and the bars represent the corresponding monthly median values. Bottom Row, Right: Correlation between the daily increments of the social isolation index and the reproduction number.

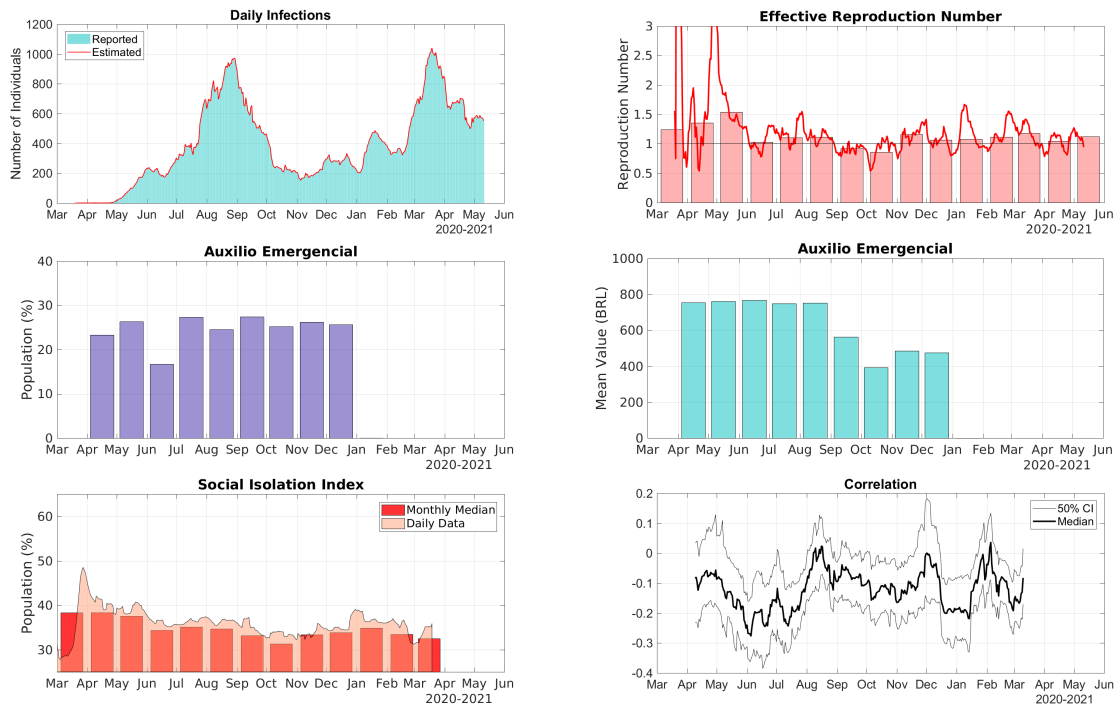

Figure S.7: Data for the State of Tocantins in the North Region of Brazil. Top Row, Right: comparison between the 7-day moving average of daily reports of infections and model predictions (right). Top Row, Left: The solid line represents the time-dependent reproduction number and the bars are the corresponding monthly median values. Middle Row, Right: The bars represent the proportions of the State population receiving the Auxílio Emergencial by month. Middle Row, Left: The bars represent the statewide average amount paid by Auxílio Emergencial each month. Bottom Row, Left: The area graph is the 7-day moving average of the social isolation index and the bars represent the corresponding monthly median values. Bottom Row, Right: Correlation between the daily increments of the social isolation index and the reproduction number.



## 2 Northeast Region

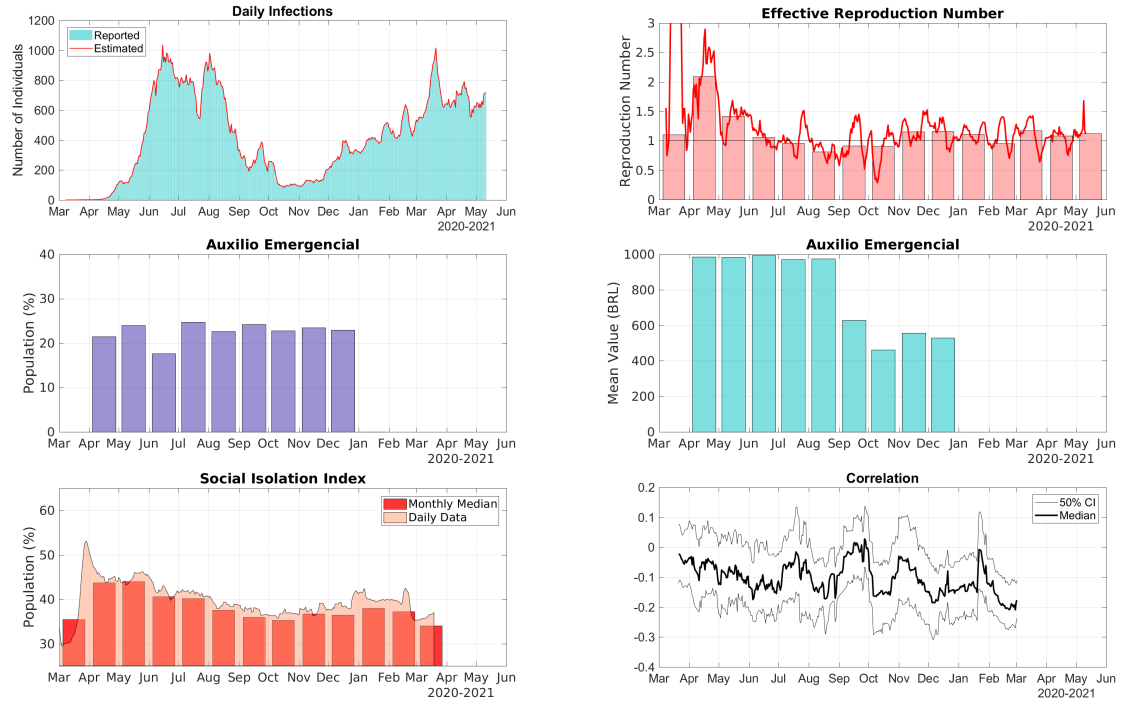

Figure S.8: Data for the State of Alagoas in the Northeast Region of Brazil. Top Row, Right: comparison between the 7-day moving average of daily reports of infections and model predictions (right). Top Row, Left: The solid line represents the time-dependent reproduction number and the bars are the corresponding monthly median values. Middle Row, Right: The bars represent the proportions of the State population receiving the Auxílio Emergencial by month. Middle Row, Left: The bars represent the statewide average amount paid by Auxílio Emergencial each month. Bottom Row, Left: The area graph is the 7-day moving average of the social isolation index and the bars represent the corresponding monthly median values. Bottom Row, Right: Correlation between the daily increments of the social isolation index and the reproduction number.

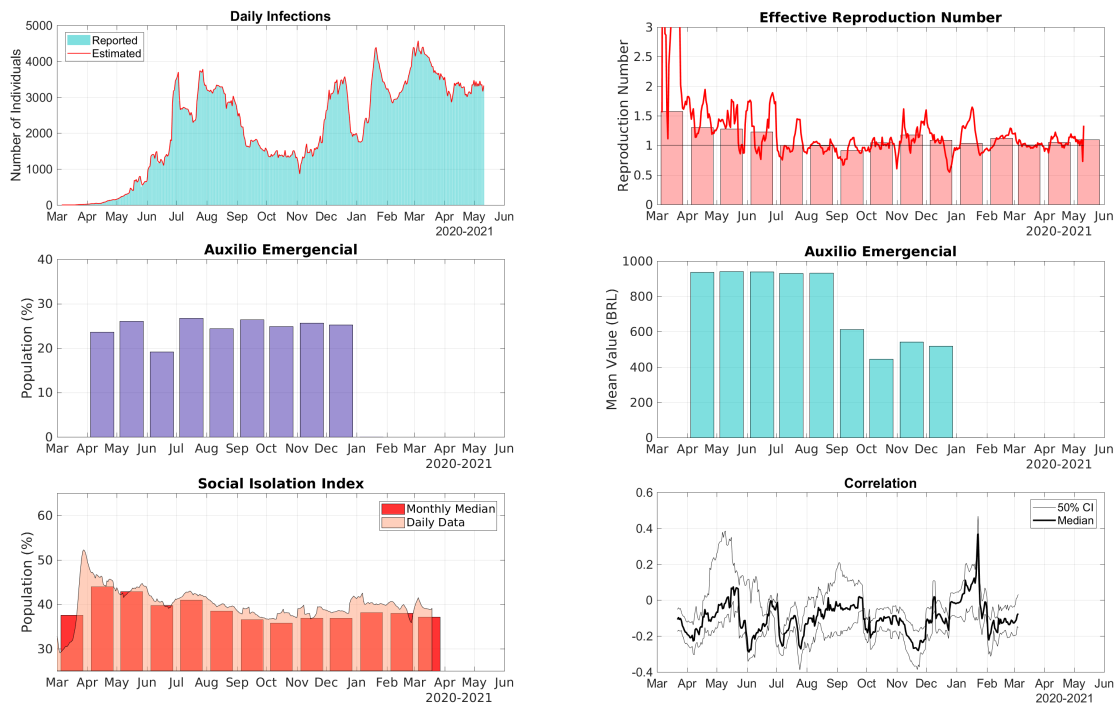

Figure S.9: Data for the State of Bahia in the Northeast Region of Brazil. Top Row, Right: comparison between the 7-day moving average of daily reports of infections and model predictions (right). Top Row, Left: The solid line represents the time-dependent reproduction number and the bars are the corresponding monthly median values. Middle Row, Right: The bars represent the proportions of the State population receiving the Auxílio Emergencial by month. Middle Row, Left: The bars represent the statewide average amount paid by Auxílio Emergencial each month. Bottom Row, Left: The area graph is the 7-day moving average of the social isolation index and the bars represent the corresponding monthly median values. Bottom Row, Right: Correlation between the daily increments of the social isolation index and the reproduction number.

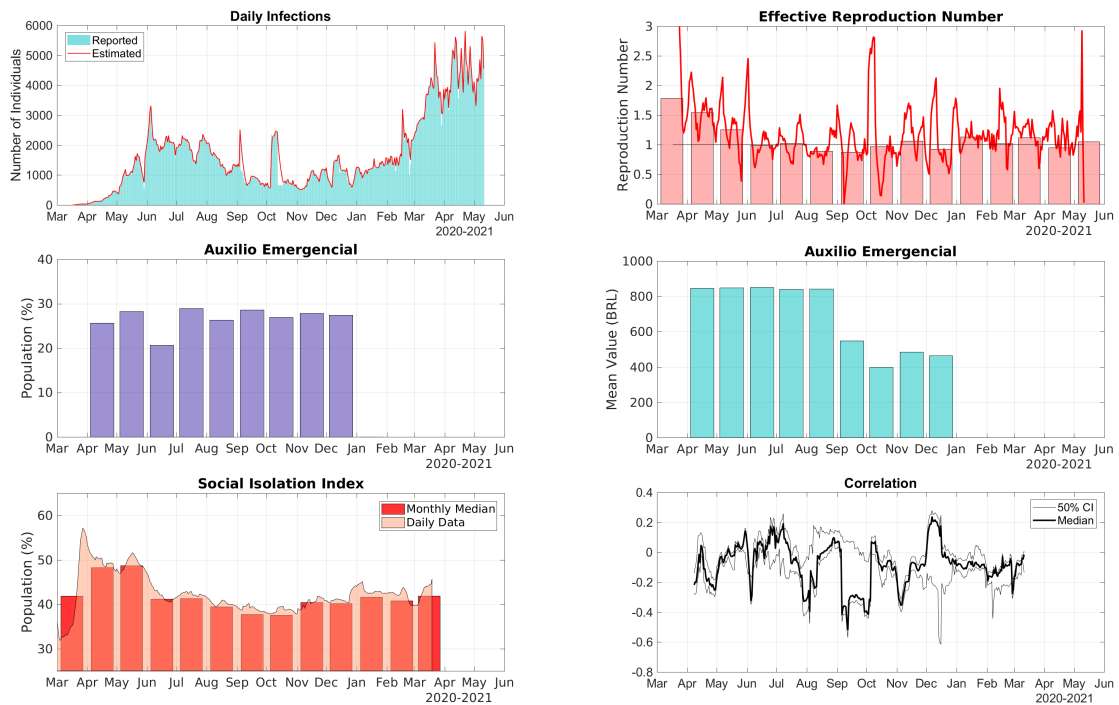

Figure S.10: Data for the State of Ceará in the Northeast Region of Brazil. Top Row, Right: comparison between the 7-day moving average of daily reports of infections and model predictions (right). Top Row, Left: The solid line represents the time-dependent reproduction number and the bars are the corresponding monthly median values. Middle Row, Right: The bars represent the proportions of the State population receiving the Auxílio Emergencial by month. Middle Row, Left: The bars represent the statewide average amount paid by Auxílio Emergencial each month. Bottom Row, Left: The area graph is the 7-day moving average of the social isolation index and the bars represent the corresponding monthly median values. Bottom Row, Right: Correlation between the daily increments of the social isolation index and the reproduction number.

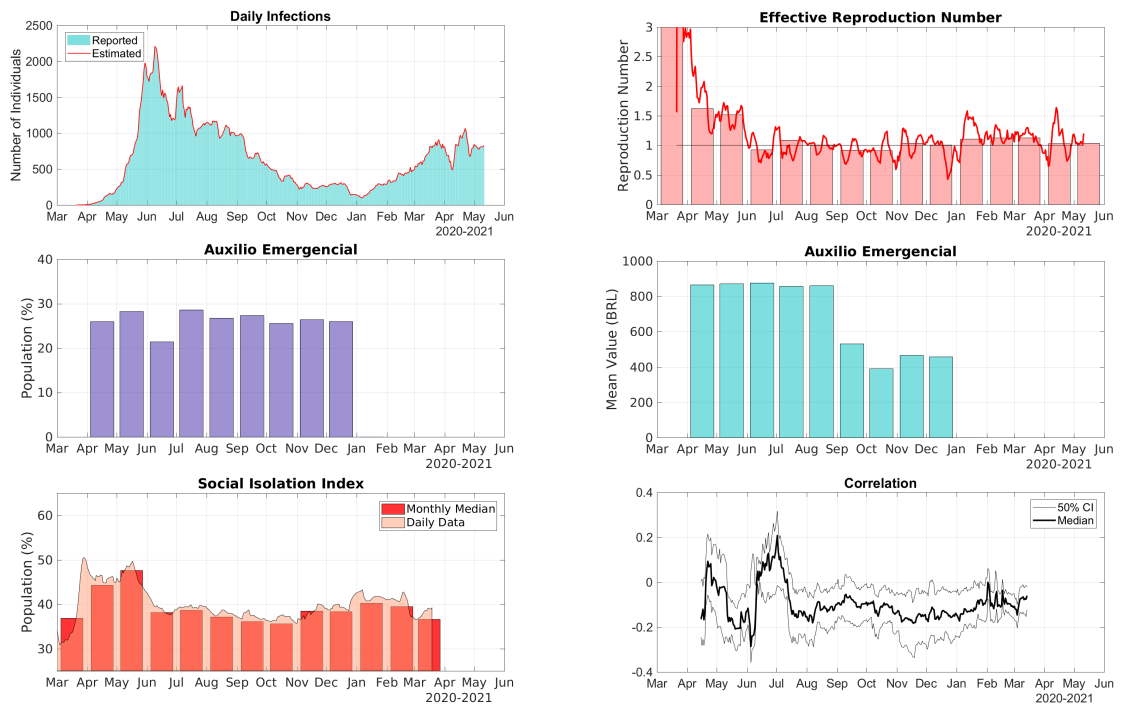

Figure S.11: Data for the State of Maranhão in the Northeast Region of Brazil. Top Row, Right: comparison between the 7-day moving average of daily reports of infections and model predictions (right). Top Row, Left: The solid line represents the time-dependent reproduction number and the bars are the corresponding monthly median values. Middle Row, Right: The bars represent the proportions of the State population receiving the Auxílio Emergencial by month. Middle Row, Left: The bars represent the statewide average amount paid by Auxílio Emergencial each month. Bottom Row, Left: The area graph is the 7-day moving average of the social isolation index and the bars represent the corresponding monthly median values. Bottom Row, Right: Correlation between the daily increments of the social isolation index and the reproduction number.

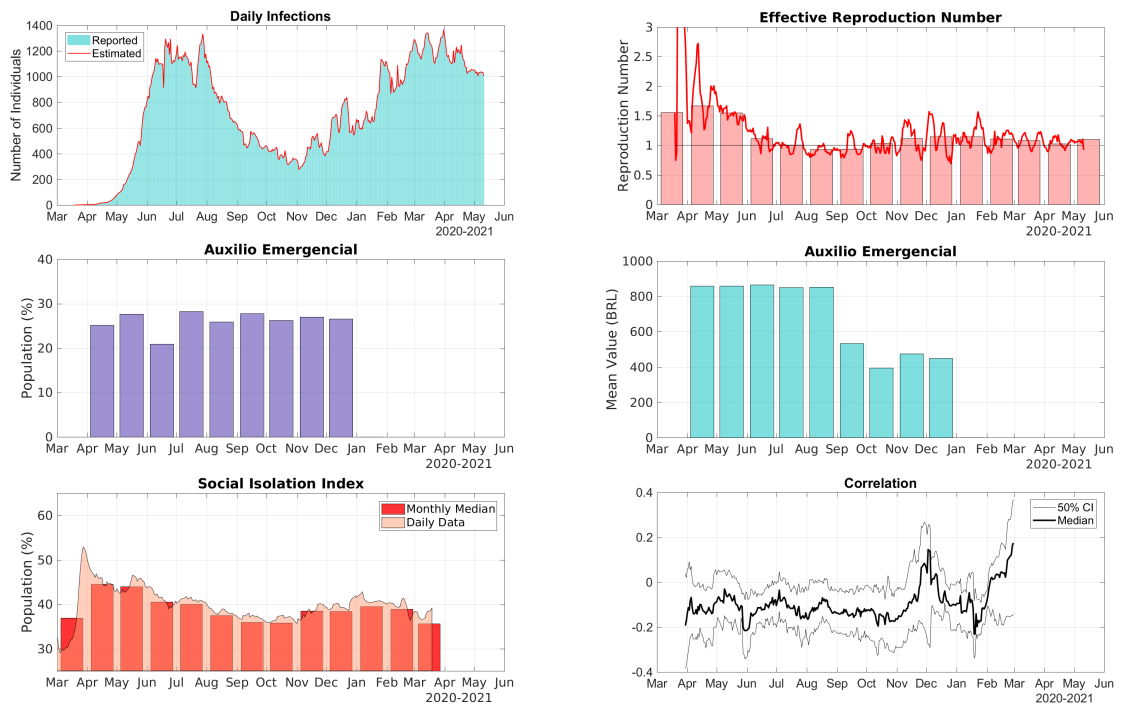

Figure S.12: Data for the State of Paraíba in the Northeast Region of Brazil. Top Row, Right: comparison between the 7-day moving average of daily reports of infections and model predictions (right). Top Row, Left: The solid line represents the time-dependent reproduction number and the bars are the corresponding monthly median values. Middle Row, Right: The bars represent the proportions of the State population receiving the Auxílio Emergencial by month. Middle Row, Left: The bars represent the statewide average amount paid by Auxílio Emergencial each month. Bottom Row, Left: The area graph is the 7-day moving average of the social isolation index and the bars represent the corresponding monthly median values. Bottom Row, Right: Correlation between the daily increments of the social isolation index and the reproduction number.

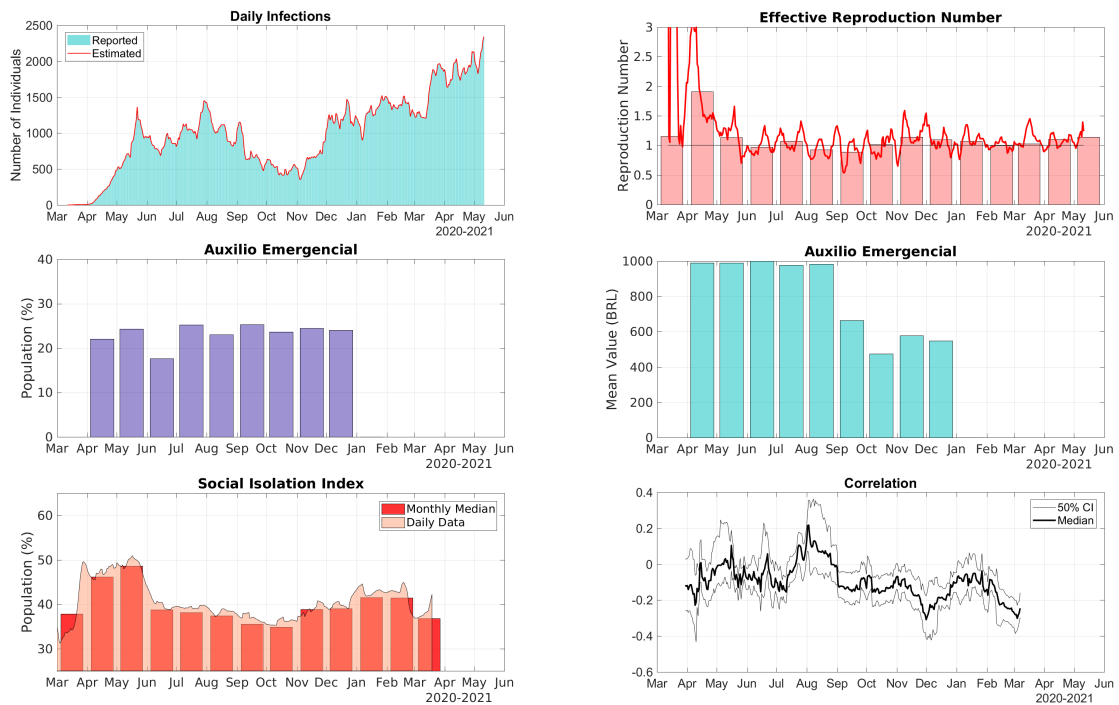

Figure S.13: Data for the State of Pernambuco in the Northeast Region of Brazil. Top Row, Right: comparison between the 7-day moving average of daily reports of infections and model predictions (right). Top Row, Left: The solid line represents the time-dependent reproduction number and the bars are the corresponding monthly median values. Middle Row, Right: The bars represent the proportions of the State population receiving the Auxílio Emergencial by month. Middle Row, Left: The bars represent the statewide average amount paid by Auxílio Emergencial each month. Bottom Row, Left: The area graph is the 7-day moving average of the social isolation index and the bars represent the corresponding monthly median values. Bottom Row, Right: Correlation between the daily increments of the social isolation index and the reproduction number.

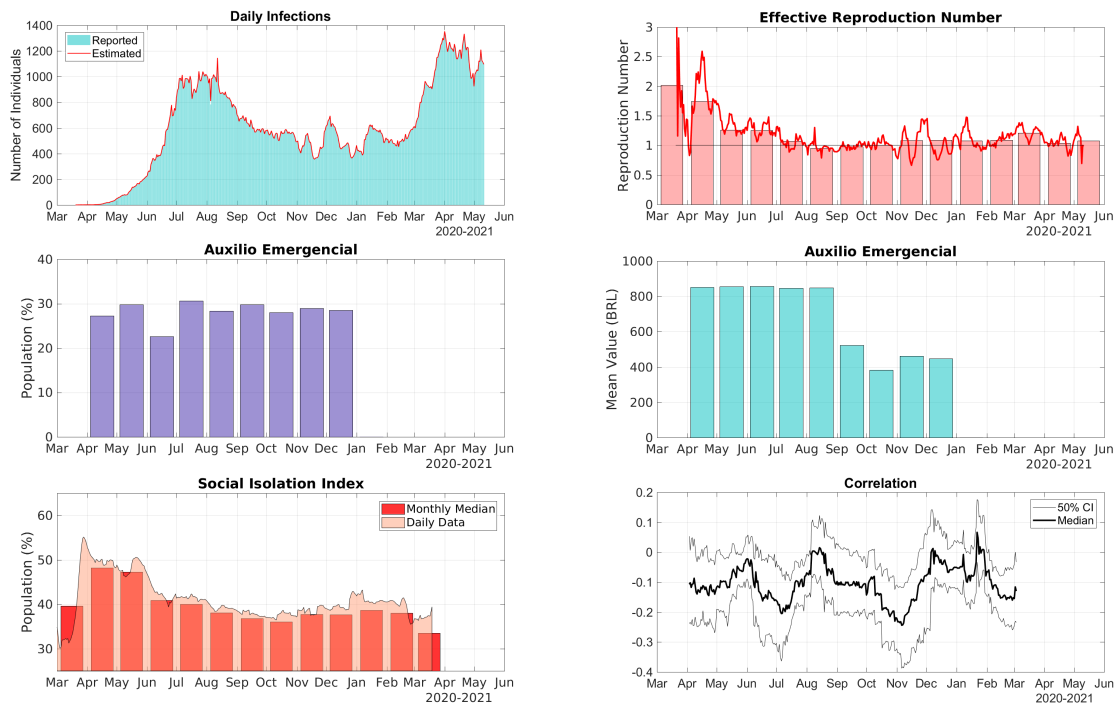

Figure S.14: Data for the State of Piauí in the Northeast Region of Brazil. Top Row, Right: comparison between the 7-day moving average of daily reports of infections and model predictions (right). Top Row, Left: The solid line represents the time-dependent reproduction number and the bars are the corresponding monthly median values. Middle Row, Right: The bars represent the proportions of the State population receiving the Auxílio Emergencial by month. Middle Row, Left: The bars represent the statewide average amount paid by Auxílio Emergencial each month. Bottom Row, Left: The area graph is the 7-day moving average of the social isolation index and the bars represent the corresponding monthly median values. Bottom Row, Right: Correlation between the daily increments of the social isolation index and the reproduction number.

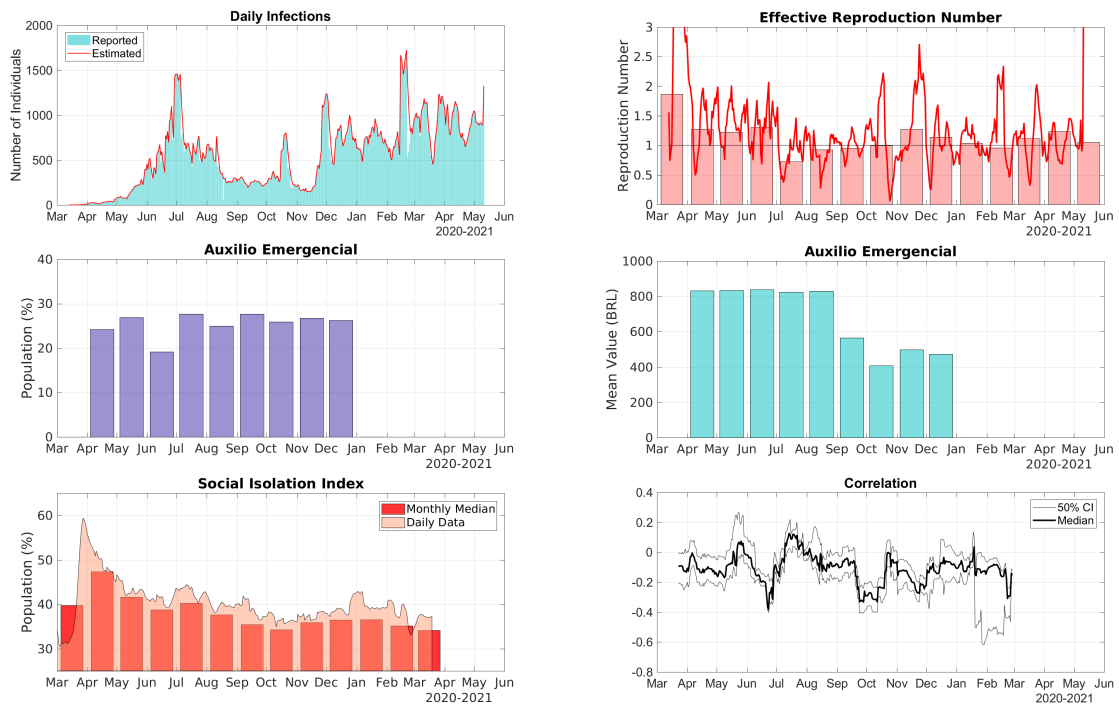

Figure S.15: Data for the State of Rio Grande do Norte in the Northeast Region of Brazil. Top Row, Right: comparison between the 7-day moving average of daily reports of infections and model predictions (right). Top Row, Left: The solid line represents the time-dependent reproduction number and the bars are the corresponding monthly median values. Middle Row, Right: The bars represent the proportions of the State population receiving the Auxílio Emergencial by month. Middle Row, Left: The bars represent the statewide average amount paid by Auxílio Emergencial each month. Bottom Row, Left: The area graph is the 7-day moving average of the social isolation index and the bars represent the corresponding monthly median values. Bottom Row, Right: Correlation between the daily increments of the social isolation index and the reproduction number.



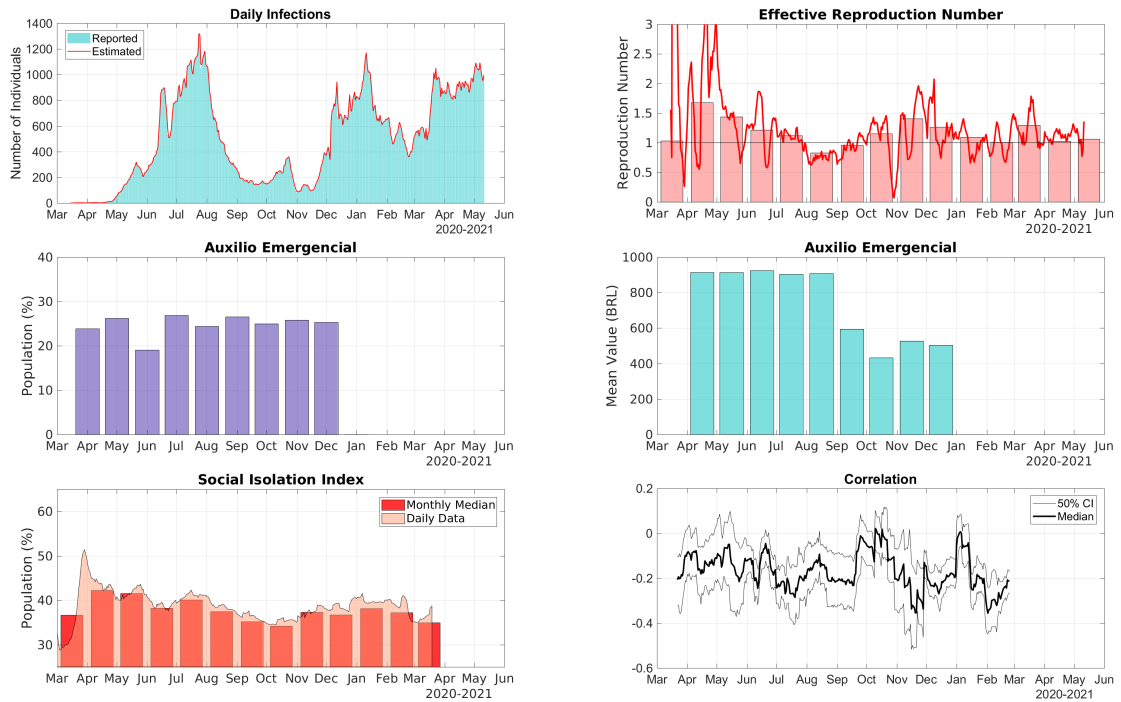

Figure S.16: Data for the State of Sergipe in the Northeast Region of Brazil. Top Row, Right: comparison between the 7-day moving average of daily reports of infections and model predictions (right). Top Row, Left: The solid line represents the time-dependent reproduction number and the bars are the corresponding monthly median values. Middle Row, Right: The bars represent the proportions of the State population receiving the Auxílio Emergencial by month. Middle Row, Left: The bars represent the statewide average amount paid by Auxílio Emergencial each month. Bottom Row, Left: The area graph is the 7-day moving average of the social isolation index and the bars represent the corresponding monthly median values. Bottom Row, Right: Correlation between the daily increments of the social isolation index and the reproduction number.

### 3 Central-West Region

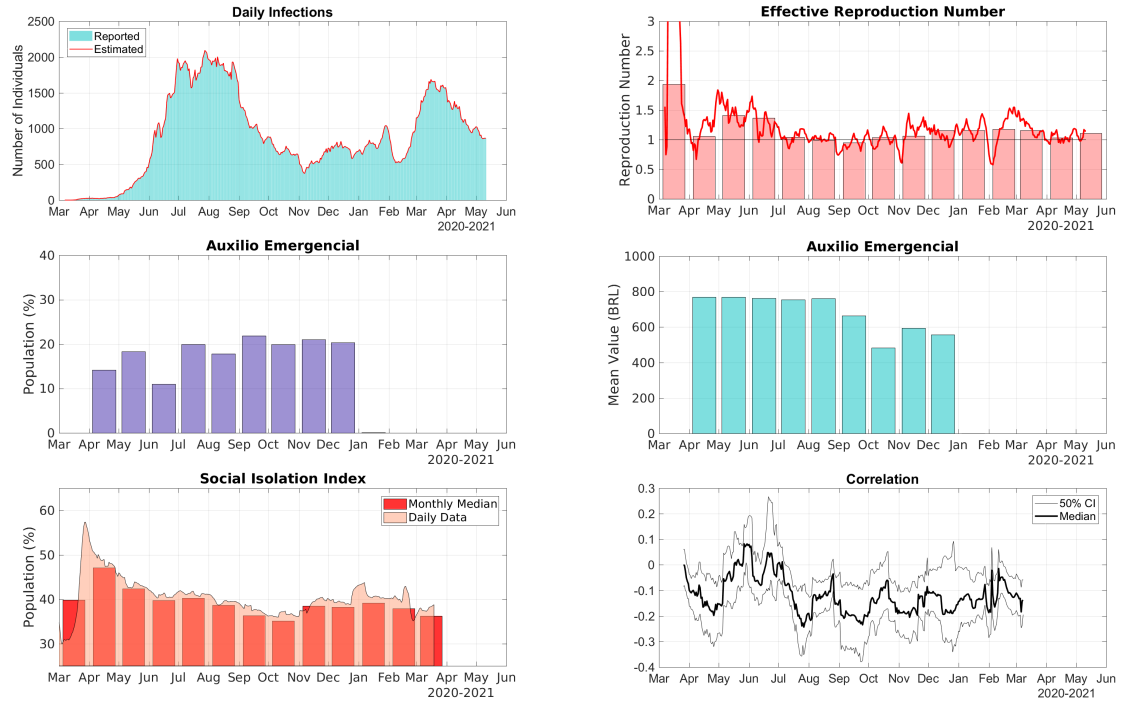

Figure S.17: Data for the Distrito Federal in the Central-West Region of Brazil. Top Row, Right: comparison between the 7-day moving average of daily reports of infections and model predictions (right). Top Row, Left: The solid line represents the time-dependent reproduction number and the bars are the corresponding monthly median values. Middle Row, Right: The bars represent the proportions of the State population receiving the Auxílio Emergencial by month. Middle Row, Left: The bars represent the statewide average amount paid by Auxílio Emergencial each month. Bottom Row, Left: The area graph is the 7-day moving average of the social isolation index and the bars represent the corresponding monthly median values. Bottom Row, Right: Correlation between the daily increments of the social isolation index and the reproduction number.

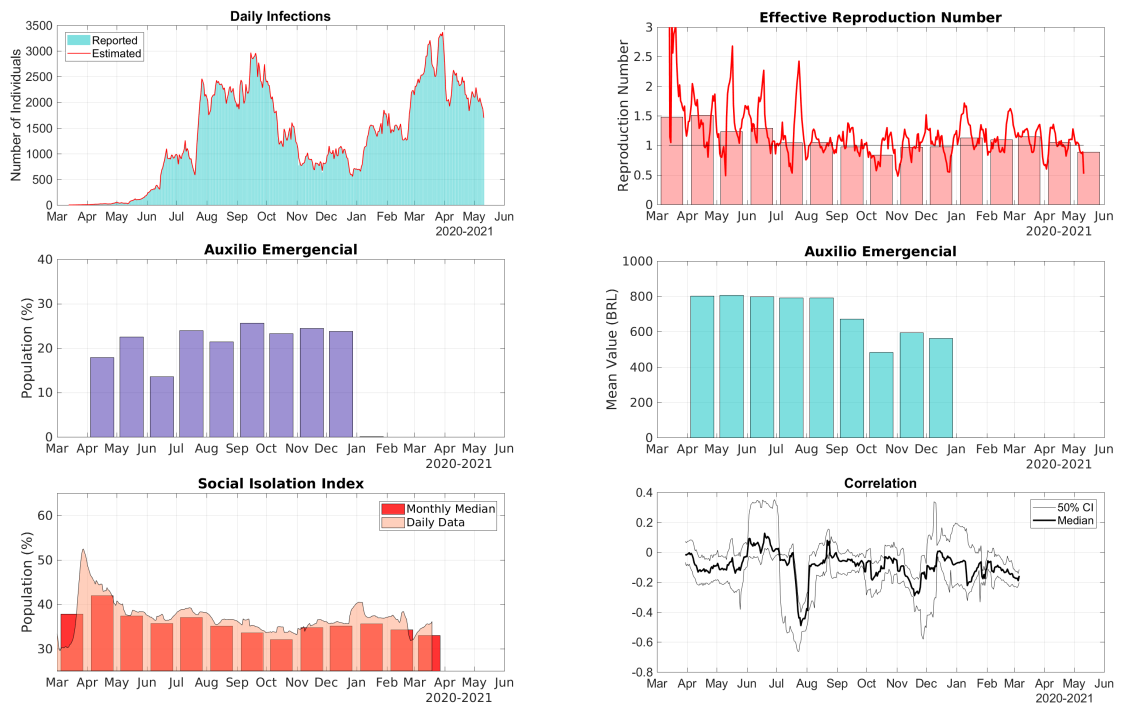

Figure S.18: Data for the State of Goiás in the Central-West Region of Brazil. Top Row, Right: comparison between the 7-day moving average of daily reports of infections and model predictions (right). Top Row, Left: The solid line represents the time-dependent reproduction number and the bars are the corresponding monthly median values. Middle Row, Right: The bars represent the proportions of the State population receiving the Auxílio Emergencial by month. Middle Row, Left: The bars represent the statewide average amount paid by Auxílio Emergencial each month. Bottom Row, Left: The area graph is the 7-day moving average of the social isolation index and the bars represent the corresponding monthly median values. Bottom Row, Right: Correlation between the daily increments of the social isolation index and the reproduction number.

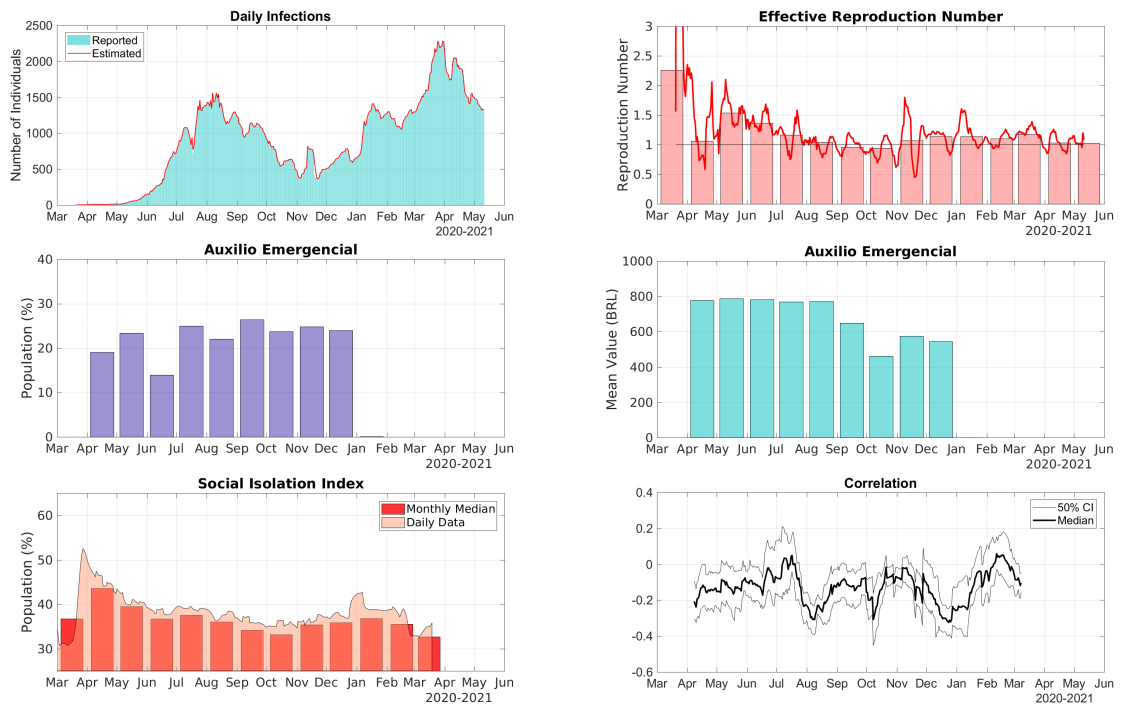

Figure S.19: Data for the State of Mato Grosso in the Central-West Region of Brazil. Top Row, Right: comparison between the 7-day moving average of daily reports of infections and model predictions (right). Top Row, Left: The solid line represents the time-dependent reproduction number and the bars are the corresponding monthly median values. Middle Row, Right: The bars represent the proportions of the State population receiving the Auxílio Emergencial by month. Middle Row, Left: The bars represent the statewide average amount paid by Auxílio Emergencial each month. Bottom Row, Left: The area graph is the 7-day moving average of the social isolation index and the bars represent the corresponding monthly median values. Bottom Row, Right: Correlation between the daily increments of the social isolation index and the reproduction number.

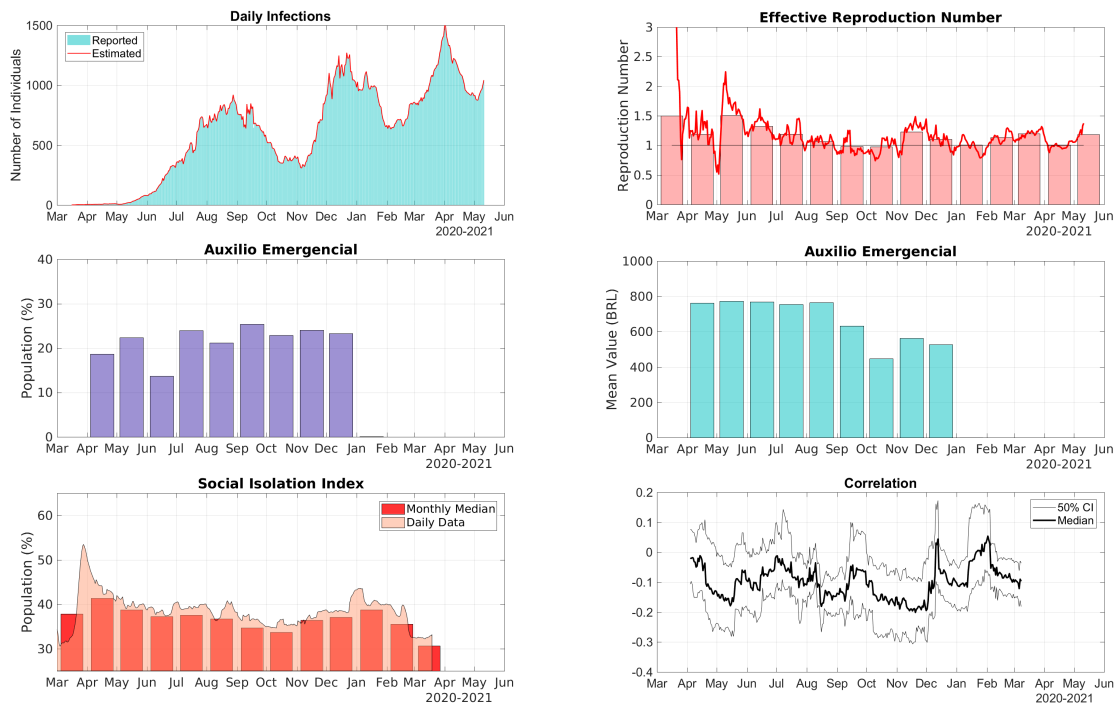

Figure S.20: Data for the State of Mato Grosso do Sul in the Central-West Region of Brazil. Top Row, Right: comparison between the 7-day moving average of daily reports of infections and model predictions (right). Top Row, Left: The solid line represents the time-dependent reproduction number and the bars are the corresponding monthly median values. Middle Row, Right: The bars represent the proportions of the State population receiving the Auxílio Emergencial by month. Middle Row, Left: The bars represent the statewide average amount paid by Auxílio Emergencial each month. Bottom Row, Left: The area graph is the 7-day moving average of the social isolation index and the bars represent the corresponding monthly median values. Bottom Row, Right: Correlation between the daily increments of the social isolation index and the reproduction number.

## 4 Southeast Region

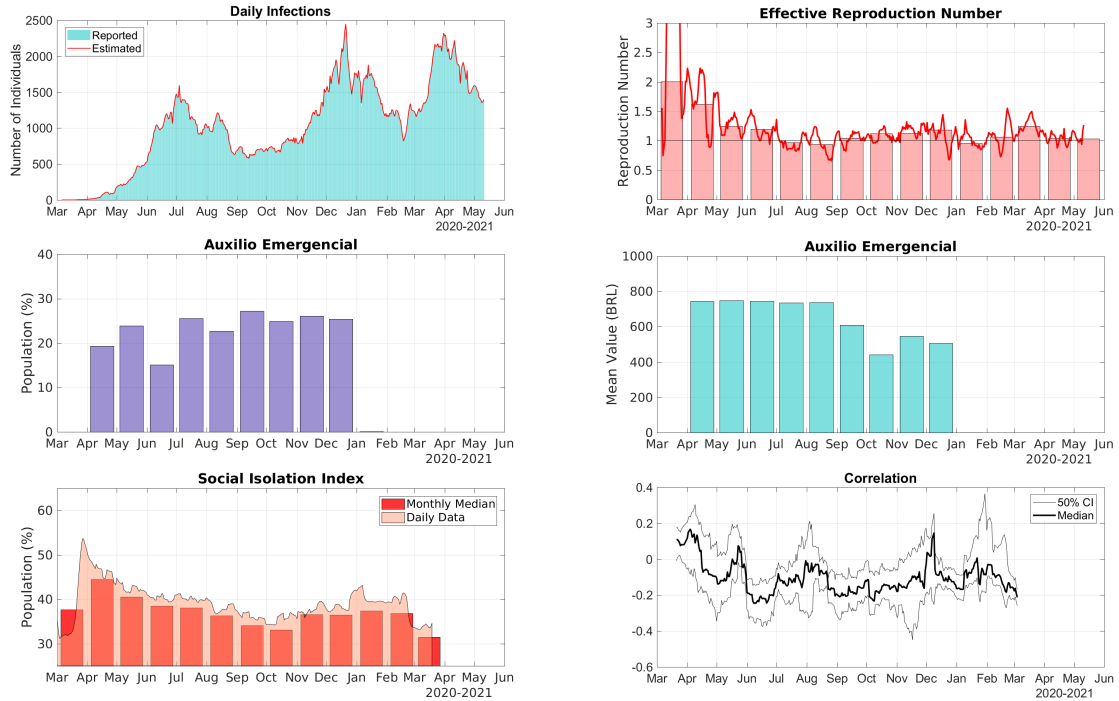

Figure S.21: Data for the State of Espírito Santo in the Southeast Region of Brazil. Top Row, Right: comparison between the 7-day moving average of daily reports of infections and model predictions (right). Top Row, Left: The solid line represents the time-dependent reproduction number and the bars are the corresponding monthly median values. Middle Row, Right: The bars represent the proportions of the State population receiving the Auxílio Emergencial by month. Middle Row, Left: The bars represent the statewide average amount paid by Auxílio Emergencial each month. Bottom Row, Left: The area graph is the 7-day moving average of the social isolation index and the bars represent the corresponding monthly median values. Bottom Row, Right: Correlation between the daily increments of the social isolation index and the reproduction number.

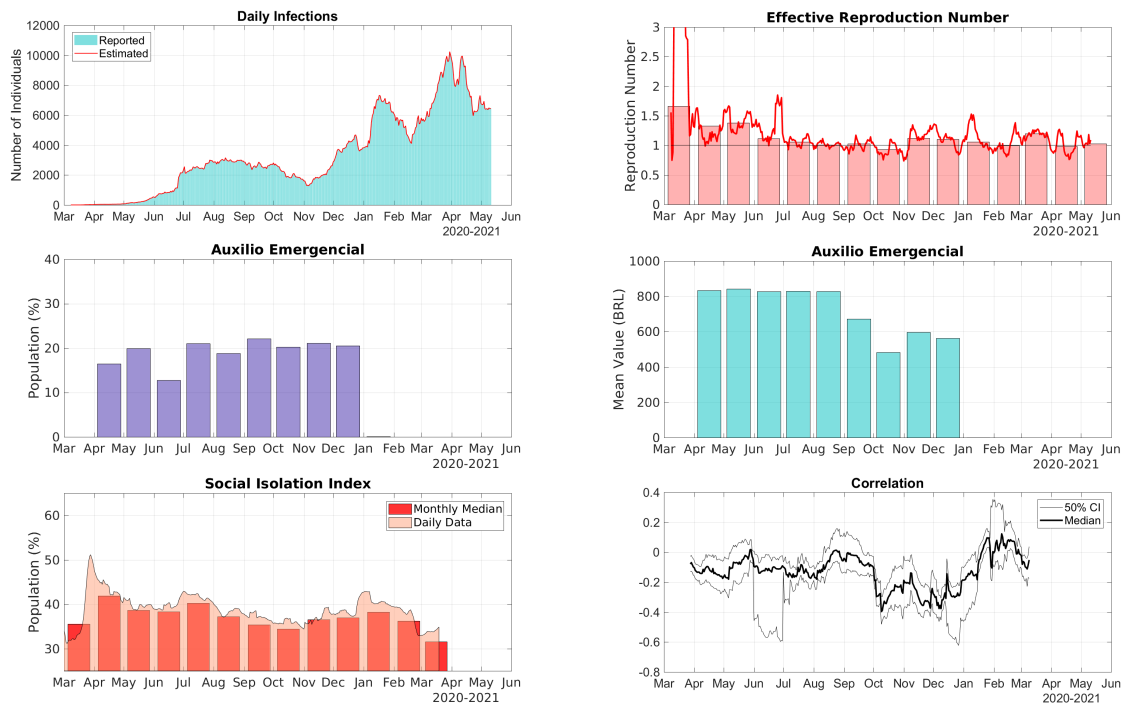

Figure S.22: Data for the State of Minas Gerais in the Southeast Region of Brazil. Top Row, Right: comparison between the 7-day moving average of daily reports of infections and model predictions (right). Top Row, Left: The solid line represents the time-dependent reproduction number and the bars are the corresponding monthly median values. Middle Row, Right: The bars represent the proportions of the State population receiving the Auxílio Emergencial by month. Middle Row, Left: The bars represent the statewide average amount paid by Auxílio Emergencial each month. Bottom Row, Left: The area graph is the 7-day moving average of the social isolation index and the bars represent the corresponding monthly median values. Bottom Row, Right: Correlation between the daily increments of the social isolation index and the reproduction number.

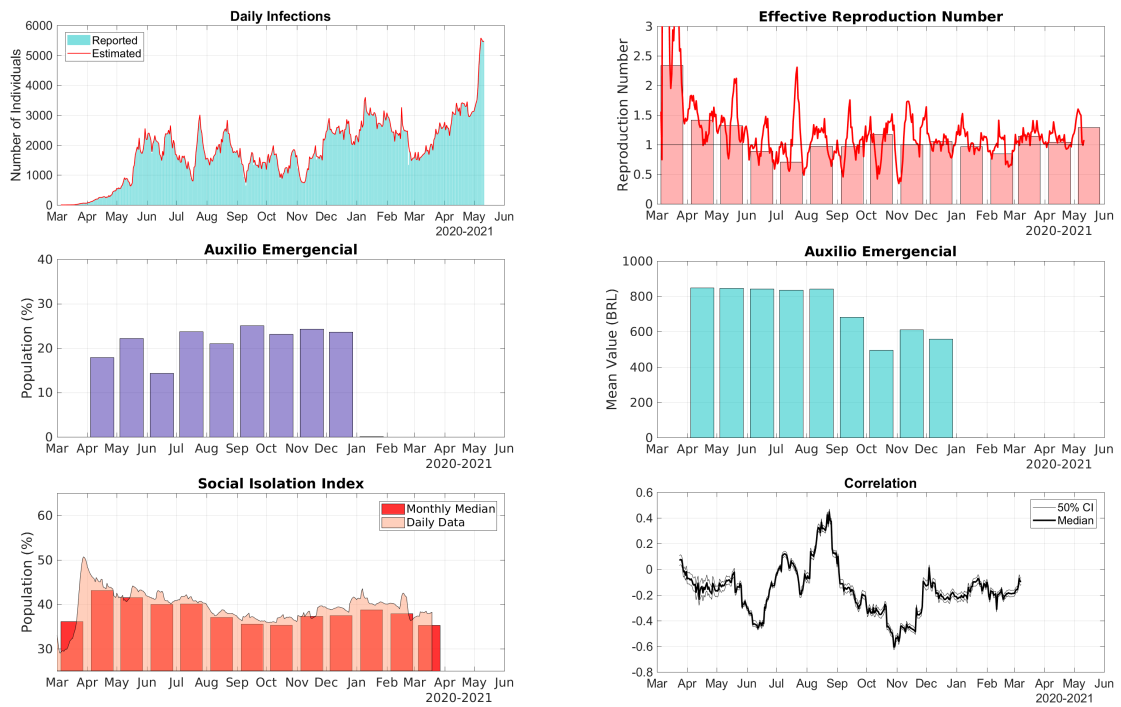

Figure S.23: Data for the State of Rio de Janeiro in the Southeast Region of Brazil. Top Row, Right: comparison between the 7-day moving average of daily reports of infections and model predictions (right). Top Row, Left: The solid line represents the time-dependent reproduction number and the bars are the corresponding monthly median values. Middle Row, Right: The bars represent the proportions of the State population receiving the Auxílio Emergencial by month. Middle Row, Left: The bars represent the statewide average amount paid by Auxílio Emergencial each month. Bottom Row, Left: The area graph is the 7-day moving average of the social isolation index and the bars represent the corresponding monthly median values. Bottom Row, Right: Correlation between the daily increments of the social isolation index and the reproduction number.



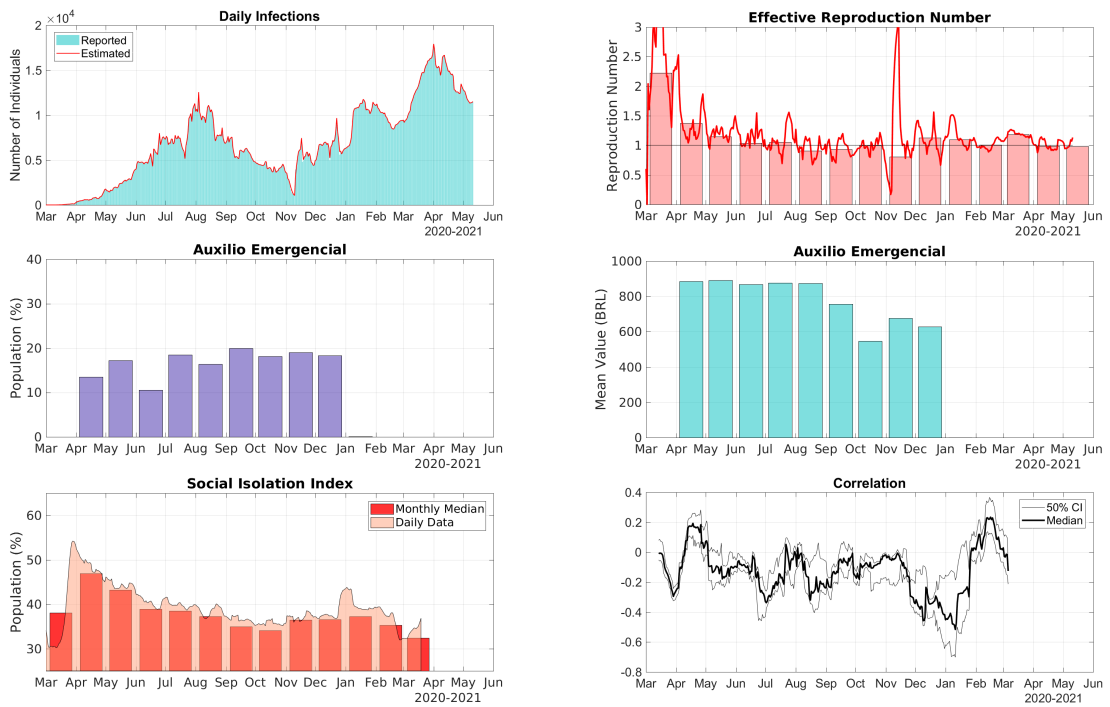

Figure S.24: Data for the State of São Paulo in the Southeast Region of Brazil. Top Row, Right: comparison between the 7-day moving average of daily reports of infections and model predictions (right). Top Row, Left: The solid line represents the time-dependent reproduction number and the bars are the corresponding monthly median values. Middle Row, Right: The bars represent the proportions of the State population receiving the Auxílio Emergencial by month. Middle Row, Left: The bars represent the statewide average amount paid by Auxílio Emergencial each month. Bottom Row, Left: The area graph is the 7-day moving average of the social isolation index and the bars represent the corresponding monthly median values. Bottom Row, Right: Correlation between the daily increments of the social isolation index and the reproduction number.

## 5 South Region

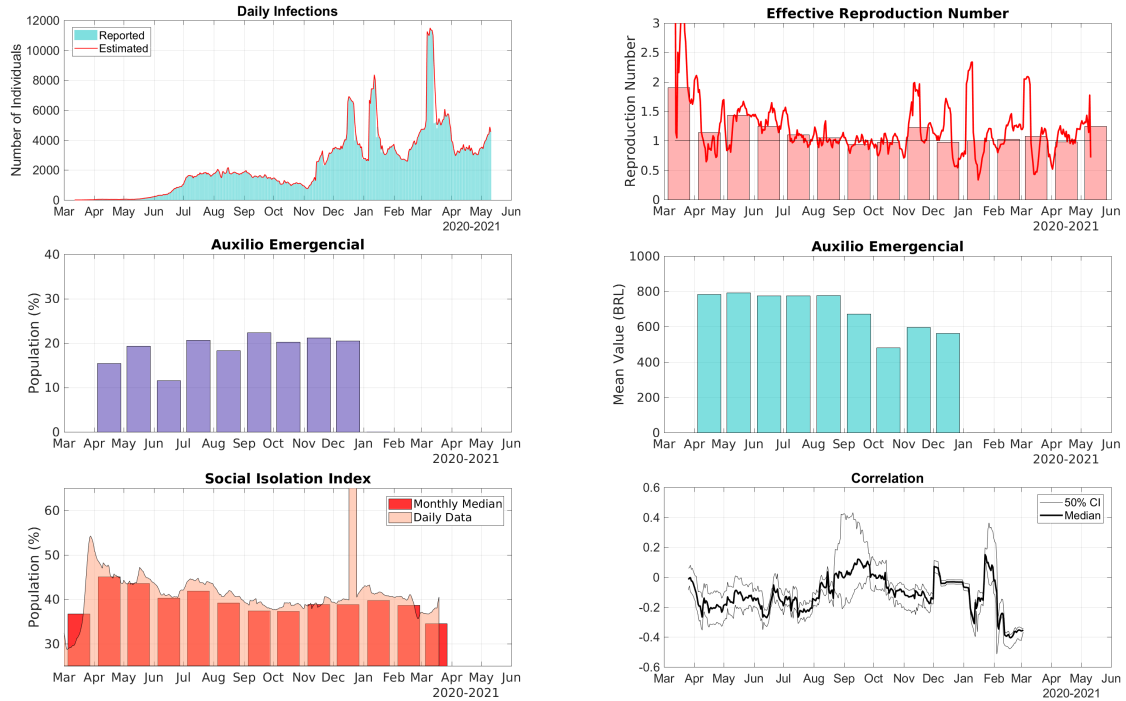

Figure S.25: Data for the State of Paraná in the South Region of Brazil. Top Row, Right: comparison between the 7-day moving average of daily reports of infections and model predictions (right). Top Row, Left: The solid line represents the time-dependent reproduction number and the bars are the corresponding monthly median values. Middle Row, Right: The bars represent the proportions of the State population receiving the Auxílio Emergencial by month. Middle Row, Left: The bars represent the statewide average amount paid by Auxílio Emergencial each month. Bottom Row, Left: The area graph is the 7-day moving average of the social isolation index and the bars represent the corresponding monthly median values. Bottom Row, Right: Correlation between the daily increments of the social isolation index and the reproduction number.

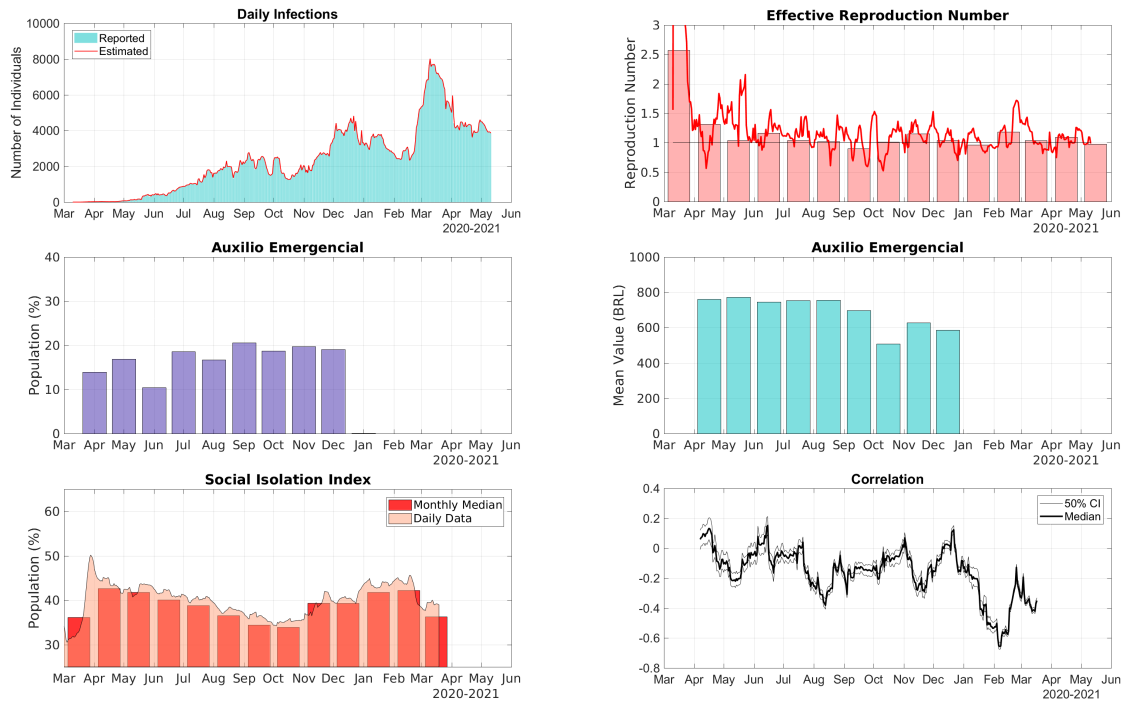

Figure S.26: Data for the State of Rio Grande do Sul in the South Region of Brazil. Top Row, Right: comparison between the 7-day moving average of daily reports of infections and model predictions (right). Top Row, Left: The solid line represents the time-dependent reproduction number and the bars are the corresponding monthly median values. Middle Row, Right: The bars represent the proportions of the State population receiving the Auxílio Emergencial by month. Middle Row, Left: The bars represent the statewide average amount paid by Auxílio Emergencial each month. Bottom Row, Left: The area graph is the 7-day moving average of the social isolation index and the bars represent the corresponding monthly median values. Bottom Row, Right: Correlation between the daily increments of the social isolation index and the reproduction number.

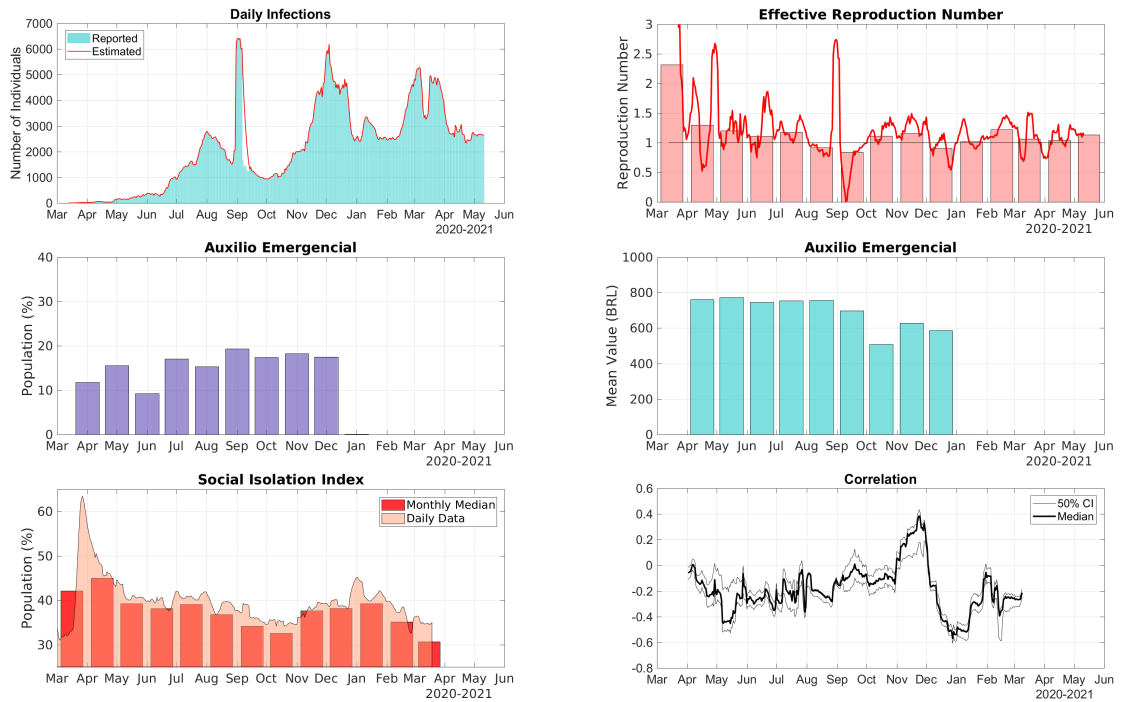

Figure S.27: Data for the State of Santa Catarina in the South Region of Brazil. Top Row, Right: comparison between the 7-day moving average of daily reports of infections and model predictions (right). Top Row, Left: The solid line represents the time-dependent reproduction number and the bars are the corresponding monthly median values. Middle Row, Right: The bars represent the proportions of the State population receiving the Auxílio Emergencial by month. Middle Row, Left: The bars represent the statewide average amount paid by Auxílio Emergencial each month. Bottom Row, Left: The area graph is the 7-day moving average of the social isolation index and the bars represent the corresponding monthly median values. Bottom Row, Right: Correlation between the daily increments of the social isolation index and the reproduction number.

## 6 Additional Tables

| State | Region | Mar-20 | Apr-20 | May-20 | Jun-20 | Jul-20 | Aug-20 | Sep-20 | Oct-20 | Nov-20 | Dec-20 | Jan-21 | Feb-21 | Mar-21 | Apr-21 | May-21 |
|-------|--------|--------|--------|--------|--------|--------|--------|--------|--------|--------|--------|--------|--------|--------|--------|--------|
| AC    | N      | 3,06   | 1,52   | 1,36   | 1,02   | 0,99   | 0,98   | 1,03   | 1,00   | 1,19   | 1,06   | 1,22   | 1,15   | 1,10   | 0,84   | 0,89   |
| AL    | NE     | 1,10   | 2,09   | 1,42   | 1,06   | 0,96   | 0,81   | 0,91   | 0,90   | 1,15   | 1,16   | 1,11   | 0,95   | 1,17   | 1,08   | 1,12   |
| AM    | N      | 2,38   | 1,68   | 1,30   | 0,93   | 1,11   | 1,01   | 1,07   | 0,96   | 0,96   | 1,10   | 1,19   | 0,94   | 1,08   | 1,02   | 1,05   |
| AP    | N      | 1,39   | 1,82   | 1,44   | 1,00   | 0,93   | 1,13   | 0,95   | 1,07   | 1,26   | 1,07   | 1,11   | 1,08   | 1,34   | 0,90   | 1,20   |
| BA    | NE     | 1,58   | 1,30   | 1,28   | 1,23   | 1,00   | 1,00   | 0,92   | 1,04   | 1,18   | 1,09   | 1,04   | 1,12   | 1,01   | 1,05   | 1,09   |
| CE    | NE     | 1,78   | 1,54   | 1,26   | 0,99   | 1,02   | 0,89   | 0,88   | 0,97   | 1,07   | 0,93   | 1,13   | 1,02   | 1,12   | 0,95   | 1,05   |
| DF    | CW     | 1,93   | 1,06   | 1,41   | 1,37   | 1,05   | 1,00   | 0,95   | 1,04   | 1,06   | 1,16   | 1,16   | 1,18   | 1,16   | 1,04   | 1,12   |
| ES    | SE     | 2,00   | 1,62   | 1,25   | 1,19   | 0,97   | 0,94   | 1,05   | 1,12   | 1,13   | 1,19   | 0,96   | 1,07   | 1,25   | 1,05   | 1,03   |
| GO    | CW     | 1,48   | 1,51   | 1,24   | 1,29   | 1,05   | 1,05   | 0,98   | 0,84   | 0,97   | 0,98   | 1,13   | 1,10   | 1,15   | 1,06   | 0,89   |
| MA    | NE     | 3,00   | 1,62   | 1,52   | 0,92   | 1,09   | 1,01   | 0,92   | 0,91   | 1,04   | 1,01   | 1,11   | 1,13   | 1,13   | 1,03   | 1,04   |
| MG    | SE     | 1,66   | 1,33   | 1,38   | 1,11   | 1,06   | 1,01   | 1,03   | 0,93   | 1,12   | 1,11   | 1,06   | 0,99   | 1,20   | 0,99   | 1,03   |
| MS    | CW     | 1,50   | 1,19   | 1,51   | 1,32   | 1,19   | 1,07   | 0,98   | 0,98   | 1,23   | 1,11   | 1,01   | 1,14   | 1,20   | 1,01   | 1,19   |
| MT    | CW     | 2,26   | 1,06   | 1,54   | 1,37   | 1,17   | 1,05   | 0,96   | 0,95   | 1,07   | 1,14   | 1,15   | 1,11   | 1,19   | 1,04   | 1,04   |
| PA    | N      | 3,05   | 1,76   | 1,50   | 1,02   | 0,91   | 1,03   | 0,90   | 0,93   | 1,00   | 1,05   | 1,20   | 1,07   | 1,09   | 1,01   | 1,02   |
| PB    | NE     | 1,56   | 1,67   | 1,55   | 1,11   | 1,01   | 0,93   | 0,94   | 1,04   | 1,12   | 1,15   | 1,15   | 1,11   | 1,08   | 1,03   | 1,10   |
| PE    | NE     | 1,16   | 1,91   | 1,13   | 0,97   | 1,07   | 0,93   | 0,89   | 1,01   | 1,14   | 1,10   | 1,07   | 0,99   | 1,02   | 1,10   | 1,14   |
| PI    | NE     | 2,02   | 1,74   | 1,26   | 1,25   | 1,07   | 0,95   | 0,98   | 1,00   | 1,08   | 1,09   | 1,08   | 1,09   | 1,21   | 1,04   | 1,08   |
| PR    | S      | 1,90   | 1,14   | 1,44   | 1,25   | 1,10   | 1,05   | 0,94   | 0,98   | 1,23   | 0,98   | 1,00   | 1,03   | 1,08   | 0,98   | 1,25   |
| RJ    | SE     | 2,34   | 1,42   | 1,32   | 0,89   | 0,71   | 0,98   | 0,97   | 1,18   | 1,00   | 1,06   | 0,97   | 0,85   | 1,15   | 1,05   | 1,30   |
| RN    | NE     | 1,86   | 1,27   | 1,22   | 1,31   | 0,72   | 0,93   | 0,95   | 1,00   | 1,27   | 1,14   | 1,04   | 0,96   | 1,12   | 1,24   | 1,05   |
| RO    | N      | 1,40   | 1,96   | 1,41   | 1,31   | 0,78   | 0,99   | 0,91   | 0,90   | 1,26   | 1,15   | 1,21   | 1,07   | 1,16   | 1,02   | 1,14   |
| RR    | N      | 2,25   | 1,55   | 1,19   | 1,37   | 0,91   | 1,03   | 1,09   | 1,14   | 0,91   | 0,88   | 1,33   | 1,23   | 1,10   | 1,26   | 1,28   |
| RS    | S      | 2,57   | 1,31   | 1,04   | 1,17   | 1,04   | 1,02   | 0,90   | 1,01   | 1,15   | 1,04   | 0,96   | 1,18   | 1,04   | 1,10   | 0,98   |
| SC    | S      | 2,32   | 1,29   | 1,20   | 1,11   | 1,18   | 0,92   | 0,84   | 1,11   | 1,16   | 0,91   | 1,02   | 1,23   | 1,07   | 1,05   | 1,15   |
| SE    | NE     | 1,03   | 1,68   | 1,44   | 1,22   | 1,12   | 0,83   | 0,96   | 1,15   | 1,41   | 1,27   | 1,09   | 1,01   | 1,30   | 1,03   | 1,06   |
| SP    | SE     | 2,23   | 1,38   | 1,15   | 1,04   | 1,05   | 0,91   | 0,93   | 0,99   | 0,81   | 1,13   | 1,10   | 1,01   | 1,18   | 0,99   | 0,98   |
| TO    | N      | 1,24   | 1,36   | 1,54   | 1,03   | 1,11   | 1,11   | 0,92   | 0,86   | 1,16   | 1,07   | 1,08   | 1,12   | 1,18   | 1,05   | 1,12   |

Table S.1: Monthly median values of the reproduction number in the Brazilian states.

| State | Region | Apr-20     | May-20     | Jun-20     | Jul-20     | Aug-20     | Sep-20     | Oct-20     | Nov-20     | Dec-20     |
|-------|--------|------------|------------|------------|------------|------------|------------|------------|------------|------------|
| AC    | N      | R\$ 752,28 | R\$ 755,60 | R\$ 757,13 | R\$ 747,78 | R\$ 750,59 | R\$ 501,52 | R\$ 365,14 | R\$ 444,98 | R\$ 416,38 |
| AL    | NE     | R\$ 985,97 | R\$ 982,85 | R\$ 993,75 | R\$ 970,99 | R\$ 974,97 | R\$ 627,79 | R\$ 461,30 | R\$ 556,13 | R\$ 528,66 |
| AM    | N      | R\$ 780,90 | R\$ 780,21 | R\$ 786,16 | R\$ 772,84 | R\$ 778,24 | R\$ 545,09 | R\$ 400,33 | R\$ 483,18 | R\$ 451,91 |
| AP    | N      | R\$ 778,26 | R\$ 775,91 | R\$ 795,34 | R\$ 766,05 | R\$ 770,25 | R\$ 558,66 | R\$ 397,73 | R\$ 491,10 | R\$ 463,51 |
| BA    | NE     | R\$ 937,55 | R\$ 941,72 | R\$ 940,22 | R\$ 931,73 | R\$ 932,72 | R\$ 612,42 | R\$ 445,48 | R\$ 542,90 | R\$ 519,31 |
| CE    | NE     | R\$ 846,61 | R\$ 848,23 | R\$ 851,73 | R\$ 839,80 | R\$ 841,70 | R\$ 548,83 | R\$ 399,18 | R\$ 484,63 | R\$ 464,09 |
| DF    | CW     | R\$ 769,64 | R\$ 769,37 | R\$ 762,81 | R\$ 754,89 | R\$ 761,52 | R\$ 662,92 | R\$ 482,11 | R\$ 593,56 | R\$ 557,28 |
| ES    | SE     | R\$ 744,43 | R\$ 748,46 | R\$ 744,19 | R\$ 735,21 | R\$ 736,41 | R\$ 608,66 | R\$ 441,69 | R\$ 546,38 | R\$ 506,08 |
| GO    | CW     | R\$ 801,76 | R\$ 807,14 | R\$ 797,68 | R\$ 791,64 | R\$ 792,03 | R\$ 671,92 | R\$ 483,87 | R\$ 594,82 | R\$ 562,63 |
| MA    | NE     | R\$ 866,46 | R\$ 871,20 | R\$ 877,13 | R\$ 858,27 | R\$ 861,45 | R\$ 531,70 | R\$ 390,30 | R\$ 467,19 | R\$ 458,47 |
| MG    | SE     | R\$ 834,10 | R\$ 842,36 | R\$ 827,68 | R\$ 829,24 | R\$ 828,48 | R\$ 671,52 | R\$ 482,11 | R\$ 597,12 | R\$ 562,48 |
| MS    | CW     | R\$ 762,56 | R\$ 773,00 | R\$ 768,47 | R\$ 755,02 | R\$ 765,51 | R\$ 632,85 | R\$ 446,42 | R\$ 562,13 | R\$ 526,91 |
| MT    | CW     | R\$ 778,40 | R\$ 788,24 | R\$ 782,33 | R\$ 769,53 | R\$ 771,59 | R\$ 649,78 | R\$ 461,15 | R\$ 575,00 | R\$ 544,76 |
| PA    | N      | R\$ 809,95 | R\$ 813,07 | R\$ 819,26 | R\$ 805,00 | R\$ 807,85 | R\$ 547,54 | R\$ 396,53 | R\$ 482,84 | R\$ 463,57 |
| PB    | NE     | R\$ 859,16 | R\$ 859,63 | R\$ 865,49 | R\$ 850,28 | R\$ 853,08 | R\$ 533,89 | R\$ 394,13 | R\$ 475,56 | R\$ 450,14 |
| PE    | NE     | R\$ 990,51 | R\$ 988,95 | R\$ 999,31 | R\$ 976,53 | R\$ 983,44 | R\$ 664,51 | R\$ 474,76 | R\$ 577,65 | R\$ 548,07 |
| PI    | NE     | R\$ 851,90 | R\$ 855,71 | R\$ 856,36 | R\$ 846,75 | R\$ 848,35 | R\$ 522,08 | R\$ 382,96 | R\$ 461,44 | R\$ 446,42 |
| PR    | S      | R\$ 783,62 | R\$ 792,75 | R\$ 774,35 | R\$ 775,62 | R\$ 777,08 | R\$ 672,41 | R\$ 480,79 | R\$ 597,13 | R\$ 562,76 |
| RJ    | SE     | R\$ 848,42 | R\$ 846,16 | R\$ 843,03 | R\$ 835,77 | R\$ 841,75 | R\$ 682,27 | R\$ 496,24 | R\$ 610,48 | R\$ 558,86 |
| RN    | NE     | R\$ 832,20 | R\$ 833,94 | R\$ 837,32 | R\$ 824,10 | R\$ 829,27 | R\$ 564,98 | R\$ 406,54 | R\$ 498,13 | R\$ 472,49 |
| RO    | N      | R\$ 743,91 | R\$ 755,35 | R\$ 746,47 | R\$ 738,25 | R\$ 740,95 | R\$ 620,22 | R\$ 438,58 | R\$ 547,53 | R\$ 515,04 |
| RR    | N      | R\$ 748,40 | R\$ 753,87 | R\$ 750,43 | R\$ 739,63 | R\$ 746,65 | R\$ 564,87 | R\$ 412,72 | R\$ 510,46 | R\$ 469,91 |
| RS    | S      | R\$ 771,56 | R\$ 777,97 | R\$ 769,12 | R\$ 763,45 | R\$ 774,51 | R\$ 681,96 | R\$ 475,20 | R\$ 593,87 | R\$ 557,20 |
| SC    | S      | R\$ 761,53 | R\$ 773,25 | R\$ 745,64 | R\$ 754,56 | R\$ 756,38 | R\$ 698,06 | R\$ 507,44 | R\$ 627,98 | R\$ 586,93 |
| SE    | NE     | R\$ 914,49 | R\$ 913,83 | R\$ 924,91 | R\$ 904,31 | R\$ 908,71 | R\$ 594,17 | R\$ 433,47 | R\$ 527,89 | R\$ 504,25 |
| SP    | SE     | R\$ 885,30 | R\$ 891,15 | R\$ 868,12 | R\$ 876,77 | R\$ 873,79 | R\$ 755,58 | R\$ 546,93 | R\$ 675,85 | R\$ 627,22 |
| TO    | N      | R\$ 753,58 | R\$ 761,15 | R\$ 767,12 | R\$ 748,91 | R\$ 751,80 | R\$ 562,60 | R\$ 392,69 | R\$ 484,97 | R\$ 475,22 |

Table S.2: Monthly average amount paid by Auxílio Emergencial during 2020 for each Brazilian state.

| State | Region | Feb-20 | Mar-20 | Apr-20 | May-20 | Jun-20 | Jul-20 | Aug-20 | Sep-20 | Oct-20 | Nov-20 | Dec-20 | Jan-21 | Feb-21 | Mar-21 |
|-------|--------|--------|--------|--------|--------|--------|--------|--------|--------|--------|--------|--------|--------|--------|--------|
| AC    | N      | 31,2%  | 43,5%  | 47,0%  | 48,1%  | 44,0%  | 43,0%  | 41,1%  | 38,6%  | 37,8%  | 42,8%  | 42,7%  | 45,8%  | 45,3%  | 38,7%  |
| AL    | NE     | 25,8%  | 35,4%  | 43,7%  | 44,0%  | 40,6%  | 40,2%  | 37,6%  | 35,9%  | 35,3%  | 36,7%  | 36,5%  | 38,0%  | 37,2%  | 34,0%  |
| AM    | N      | 27,8%  | 42,6%  | 47,7%  | 51,8%  | 43,7%  | 41,6%  | 38,7%  | 37,3%  | 36,2%  | 39,9%  | 39,8%  | 42,9%  | 42,0%  | 36,3%  |
| AP    | N      | 30,5%  | 43,2%  | 52,3%  | 48,1%  | 40,8%  | 40,6%  | 39,3%  | 37,2%  | 36,7%  | 41,7%  | 42,4%  | 53,0%  | 48,2%  | 40,1%  |
| BA    | NE     | 26,5%  | 37,6%  | 43,9%  | 42,9%  | 39,8%  | 41,0%  | 38,5%  | 36,6%  | 35,8%  | 36,9%  | 36,9%  | 38,2%  | 38,0%  | 37,1%  |
| CE    | NE     | 28,3%  | 41,9%  | 48,3%  | 48,7%  | 41,2%  | 41,3%  | 39,4%  | 37,8%  | 37,6%  | 40,4%  | 40,2%  | 41,6%  | 40,8%  | 41,9%  |
| DF    | CW     | 26,5%  | 39,8%  | 47,1%  | 42,4%  | 39,8%  | 40,2%  | 38,7%  | 36,3%  | 35,1%  | 38,5%  | 38,2%  | 39,1%  | 37,9%  | 36,3%  |
| ES    | SE     | 27,4%  | 37,6%  | 44,5%  | 40,6%  | 38,5%  | 38,1%  | 36,3%  | 34,1%  | 33,1%  | 36,6%  | 36,5%  | 37,4%  | 36,8%  | 31,5%  |
| GO    | CW     | 26,3%  | 37,8%  | 42,0%  | 37,4%  | 35,7%  | 37,1%  | 35,1%  | 33,6%  | 32,1%  | 34,8%  | 35,2%  | 35,6%  | 34,3%  | 33,0%  |
| MA    | NE     | 27,8%  | 36,9%  | 44,3%  | 47,6%  | 38,2%  | 38,7%  | 37,2%  | 36,1%  | 35,6%  | 38,5%  | 38,4%  | 40,3%  | 39,5%  | 36,6%  |
| MG    | SE     | 28,2%  | 35,6%  | 41,9%  | 38,6%  | 38,3%  | 40,2%  | 37,2%  | 35,4%  | 34,4%  | 36,6%  | 36,9%  | 38,3%  | 36,3%  | 31,6%  |
| MS    | CW     | 28,5%  | 37,8%  | 41,4%  | 38,7%  | 37,3%  | 37,6%  | 36,7%  | 34,7%  | 33,7%  | 36,4%  | 37,1%  | 38,8%  | 35,5%  | 30,6%  |
| MT    | CW     | 27,0%  | 36,8%  | 43,6%  | 39,5%  | 36,7%  | 37,6%  | 36,1%  | 34,2%  | 33,2%  | 35,4%  | 35,9%  | 36,8%  | 35,6%  | 32,7%  |
| PA    | N      | 27,4%  | 37,4%  | 44,3%  | 39,4%  | 37,9%  | 38,6%  | 37,1%  | 34,1%  | 32,8%  | 36,8%  | 36,8%  | 38,3%  | 35,5%  | 34,3%  |
| PB    | NE     | 26,5%  | 36,9%  | 44,5%  | 44,0%  | 40,5%  | 40,0%  | 37,5%  | 36,0%  | 35,8%  | 38,5%  | 38,4%  | 39,5%  | 38,9%  | 35,6%  |
| PE    | NE     | 28,1%  | 37,9%  | 46,2%  | 48,6%  | 38,8%  | 38,2%  | 37,4%  | 35,6%  | 34,9%  | 38,9%  | 39,0%  | 41,5%  | 41,4%  | 36,8%  |
| PI    | NE     | 26,5%  | 39,6%  | 48,2%  | 47,3%  | 40,9%  | 40,0%  | 38,1%  | 36,8%  | 36,0%  | 37,7%  | 37,7%  | 38,6%  | 38,0%  | 33,5%  |
| PR    | S      | 26,4%  | 36,7%  | 45,1%  | 43,6%  | 40,3%  | 41,9%  | 39,2%  | 37,4%  | 37,3%  | 38,9%  | 38,8%  | 39,8%  | 38,7%  | 34,5%  |
| RJ    | SE     | 26,2%  | 36,1%  | 43,1%  | 41,5%  | 40,0%  | 40,1%  | 37,1%  | 35,6%  | 35,3%  | 37,3%  | 37,4%  | 38,8%  | 37,9%  | 35,3%  |
| RN    | NE     | 28,1%  | 39,8%  | 47,3%  | 41,6%  | 38,8%  | 40,3%  | 37,7%  | 35,4%  | 34,3%  | 35,9%  | 36,5%  | 36,6%  | 35,2%  | 34,1%  |
| RO    | N      | 29,2%  | 41,1%  | 49,5%  | 46,6%  | 41,3%  | 40,3%  | 38,6%  | 37,1%  | 35,8%  | 39,3%  | 39,9%  | 40,6%  | 39,2%  | 33,2%  |
| RR    | N      | 29,4%  | 38,7%  | 44,6%  | 43,0%  | 42,0%  | 41,3%  | 38,9%  | 36,9%  | 36,4%  | 40,3%  | 40,5%  | 46,2%  | 42,3%  | 37,6%  |
| RS    | S      | 27,3%  | 36,2%  | 42,7%  | 41,8%  | 40,1%  | 38,8%  | 36,6%  | 34,4%  | 33,9%  | 39,4%  | 39,3%  | 41,8%  | 42,2%  | 36,3%  |
| SC    | S      | 28,5%  | 42,1%  | 45,0%  | 39,3%  | 38,1%  | 39,1%  | 36,8%  | 34,2%  | 32,6%  | 37,6%  | 38,2%  | 39,3%  | 35,2%  | 30,7%  |
| SE    | NE     | 26,0%  | 36,7%  | 42,3%  | 41,6%  | 38,3%  | 40,1%  | 37,5%  | 35,2%  | 34,2%  | 37,3%  | 36,7%  | 38,1%  | 37,2%  | 35,0%  |
| SP    | SE     | 26,5%  | 38,1%  | 46,9%  | 43,2%  | 38,9%  | 38,5%  | 37,3%  | 35,0%  | 34,1%  | 36,5%  | 36,6%  | 37,3%  | 35,3%  | 32,4%  |
| TO    | N      | 24,6%  | 38,3%  | 38,4%  | 37,5%  | 34,4%  | 35,1%  | 34,7%  | 33,2%  | 31,3%  | 33,4%  | 33,8%  | 34,9%  | 33,5%  | 32,5%  |

Table S.3: Monthly median values of the social isolation index (SII).

| State | Region | Feb-20 | Mar-20 | Apr-20 | May-20 | Jun-20 | Jul-20 | Aug-20 | Sep-20 | Oct-20 | Nov-20 | Dec-20 | Jan-21 | Feb-21 | Mar-21 | Apr-21 |
|-------|--------|--------|--------|--------|--------|--------|--------|--------|--------|--------|--------|--------|--------|--------|--------|--------|
| AC    | N      | 0,00   | 4,70   | 40,5   | 650    | 786    | 712    | 561    | 400    | 288    | 611    | 599    | 765    | 1014   | 1355   | 911    |
| AL    | NE     | 0,00   | 0,54   | 30,6   | 276    | 766    | 709    | 569    | 241    | 117    | 125    | 293    | 386    | 417    | 649    | 602    |
| AM    | N      | 0,00   | 4,16   | 121    | 859    | 700    | 716    | 460    | 452    | 531    | 393    | 542    | 1578   | 1154   | 788    | 515    |
| AP    | N      | 0,00   | 1,16   | 124    | 989    | 2192   | 926    | 780    | 587    | 455    | 807    | 1052   | 1026   | 768    | 1611   | 953    |
| BA    | NE     | 0,00   | 1,43   | 17,7   | 104    | 368    | 622    | 607    | 360    | 286    | 334    | 605    | 634    | 643    | 801    | 651    |
| CE    | NE     | 0,00   | 4,25   | 78,5   | 445    | 655    | 710    | 447    | 285    | 359    | 288    | 375    | 417    | 566    | 1229   | 1407   |
| DF    | CW     | 0,00   | 10,9   | 33,5   | 276    | 1291   | 1868   | 1825   | 989    | 687    | 520    | 738    | 832    | 641    | 1560   | 1127   |
| ES    | SE     | 0,00   | 2,07   | 58,6   | 276    | 817    | 896    | 688    | 498    | 596    | 841    | 1436   | 1128   | 792    | 1375   | 1339   |
| GO    | CW     | 0,00   | 0,91   | 10,1   | 41,1   | 291    | 612    | 908    | 1081   | 647    | 337    | 414    | 586    | 636    | 1244   | 944    |
| MA    | NE     | 0,00   | 0,44   | 44,4   | 442    | 644    | 565    | 435    | 309    | 172    | 103    | 109    | 92     | 166    | 325    | 344    |
| MG    | SE     | 0,00   | 1,29   | 7,29   | 40,6   | 162    | 386    | 420    | 369    | 300    | 269    | 594    | 900    | 677    | 1152   | 1105   |
| MS    | CW     | 0,00   | 1,71   | 7,37   | 43,9   | 231    | 604    | 854    | 739    | 450    | 595    | 1235   | 970    | 730    | 1213   | 1160   |
| MT    | CW     | 0,00   | 0,71   | 7,71   | 60,5   | 375    | 1027   | 1120   | 909    | 553    | 432    | 604    | 1032   | 953    | 1677   | 1457   |
| PA    | N      | 0,00   | 0,37   | 32,7   | 404    | 751    | 592    | 516    | 355    | 259    | 203    | 265    | 412    | 407    | 608    | 622    |
| PB    | NE     | 0,00   | 0,42   | 19,7   | 306    | 837    | 887    | 569    | 383    | 294    | 300    | 526    | 621    | 731    | 942    | 829    |
| PE    | NE     | 0,00   | 0,90   | 70,6   | 287    | 254    | 376    | 318    | 225    | 163    | 203    | 413    | 407    | 397    | 517    | 596    |
| PI    | NE     | 0,00   | 0,55   | 15,1   | 135    | 472    | 946    | 790    | 569    | 524    | 418    | 477    | 498    | 447    | 954    | 1079   |
| PR    | S      | 0,00   | 1,55   | 10,7   | 28,5   | 158    | 462    | 484    | 408    | 300    | 578    | 1185   | 1153   | 848    | 1729   | 882    |
| RJ    | SE     | 0,00   | 4,08   | 50,4   | 253    | 341    | 305    | 335    | 237    | 260    | 256    | 462    | 497    | 357    | 373    | 546    |
| RN    | NE     | 0,00   | 2,32   | 31,0   | 176    | 648    | 570    | 321    | 217    | 332    | 395    | 650    | 637    | 745    | 831    | 756    |
| RO    | N      | 0,00   | 0,45   | 27,5   | 247    | 908    | 988    | 900    | 599    | 320    | 494    | 846    | 1611   | 1342   | 2143   | 1418   |
| RR    | N      | 0,00   | 2,53   | 79,7   | 468    | 1769   | 2753   | 1822   | 1098   | 1083   | 957    | 850    | 860    | 1257   | 1184   | 1076   |
| RS    | S      | 0,00   | 2,40   | 10,4   | 68,9   | 154    | 348    | 518    | 567    | 499    | 652    | 1117   | 854    | 820    | 1790   | 1134   |
| SC    | S      | 0,00   | 3,02   | 25,7   | 95,9   | 239    | 796    | 1292   | 520    | 599    | 1453   | 1768   | 1161   | 1293   | 1880   | 1117   |
| SE    | NE     | 0,00   | 0,82   | 18,5   | 283    | 794    | 1436   | 596    | 212    | 297    | 251    | 964    | 1074   | 603    | 1000   | 1172   |
| SP    | SE     | 0,00   | 5,05   | 56,9   | 175    | 371    | 564    | 566    | 392    | 282    | 271    | 477    | 681    | 571    | 925    | 937    |
| TO    | N      | 0,00   | 0,69   | 7,92   | 254    | 414    | 884    | 1627   | 1088   | 476    | 381    | 549    | 746    | 736    | 1701   | 1178   |

Table S.4: Number of COVID-19 infections per 100K individuals by month for each Brazilian state.
